# Supplementary material for: The Discovery of a New Mimivirus Isolate in Association with Virophage-Transpoviron Elements in Brazil Highlights the Main Genomic and Evolutionary Features of This Tripartite System
Source: MDPI journal article supplement (doi:10.3390/v14020206), 2022-01-21
Supplement: s1 [file s1]

Table S1 - Detailed annotation of mimivirus argemont genome through BLASTp analysis

| ORF | Size (aa) | Start | Stop  | Strand | Best hit BLASTp (nr)                                                                         | Score | Query cover | e-value   | Identity |
|-----|-----------|-------|-------|--------|----------------------------------------------------------------------------------------------|-------|-------------|-----------|----------|
| 1   | 231       | 2     | 694   | -      | hypothetical protein [Mimivirus reunion]                                                     | 379   | 100%        | 5,00E-128 | 87.50%   |
| 2   | 218       | 1131  | 1787  | -      | hypothetical protein MIMI_gp0006 [Acanthamoeba polyphaga mimivirus]                          | 444   | 100%        | 3,00E-157 | 100.00%  |
| 3   | 155       | 2764  | 3231  | -      | hypothetical protein MIMI_gp0007 [Acanthamoeba polyphaga mimivirus]                          | 314   | 100%        | 5,00E-108 | 100.00%  |
| 4   | 1047      | 3383  | 6526  | +      | Helicase [Acanthamoeba castellanii mamavirus]                                                | 2117  | 100%        | 0.0       | 100.00%  |
| 5   | 376       | 6886  | 8016  | +      | hypothetical protein MIMI_gp0009 [Acanthamoeba polyphaga mimivirus]                          | 762   | 100%        | 0.0       | 100.00%  |
| 6   | 376       | 8328  | 9458  | +      | TSorf172 domain-containing protein [Acanthamoeba castellanii mamavirus]                      | 754   | 100%        | 0.0       | 100.00%  |
| 7   | 85        | 9633  | 9890  | -      | uncharacterized Bro-N domain-containing protein [Acanthamoeba polyphaga mimivirus]           | 171   | 100%        | 2,00E-53  | 100.00%  |
| 8   | 232       | 9930  | 10628 | +      | Uncharacterized protein R11 [Acanthamoeba polyphaga mimivirus]                               | 469   | 100%        | 2,00E-166 | 100.00%  |
| 9   | 84        | 10755 | 11009 | +      | hypothetical protein MIMI_gp0013 [Acanthamoeba polyphaga mimivirus]                          | 176   | 100%        | 2,00E-55  | 100.00%  |
| 10  | 90        | 11312 | 11584 | +      | putative replication origin-binding protein [Hirudovirus strain Sangsue]                     | 180   | 100%        | 6,00E-57  | 98.89%   |
| 11  | 487       | 11773 | 13236 | -      | hypothetical protein MIMI_gp0014 [Acanthamoeba polyphaga mimivirus]                          | 970   | 100%        | 0.0       | 100.00%  |
| 12  | 183       | 13598 | 14149 | +      | hypothetical protein MIMI_gp0015 [Acanthamoeba polyphaga mimivirus]                          | 358   | 100%        | 1,00E-124 | 100.00%  |
| 13  | 67        | 14196 | 14399 | +      | hypothetical protein HIRU_5992 [Hirudovirus strain Sangsue]                                  | 134   | 100%        | 3,00E-39  | 100.00%  |
| 14  | 467       | 15021 | 16424 | -      | putative ankryrin repeat protein [Acanthamoeba polyphaga mimivirus]                          | 927   | 100%        | 0.0       | 100.00%  |
| 15  | 60        | 16484 | 16666 | -      | hypothetical protein MIMI_gp0976 [Acanthamoeba polyphaga mimivirus]                          | 122   | 100%        | 5,00E-35  | 100.00%  |
| 16  | 210       | 16738 | 17370 | +      | hypothetical protein MIMI_gp0975 [Acanthamoeba polyphaga mimivirus]                          | 430   | 100%        | 3,00E-152 | 100.00%  |
| 17  | 431       | 17602 | 18897 | +      | hypothetical protein MIMI_gp0974 [Acanthamoeba polyphaga mimivirus]                          | 874   | 100%        | 0.0       | 100.00%  |
| 18  | 62        | 18961 | 19149 | -      | hypothetical protein MIMI_gp0973 [Acanthamoeba polyphaga mimivirus]                          | 114   | 100%        | 1,00E-31  | 100.00%  |
| 19  | 132       | 19306 | 19704 | +      | hypothetical protein MIMI_gp0972 [Acanthamoeba polyphaga mimivirus]                          | 273   | 100%        | 1,00E-92  | 100.00%  |
| 20  | 196       | 19963 | 20553 | -      | hypothetical protein [Acanthamoeba castellanii mamavirus]                                    | 399   | 100%        | 3,00E-140 | 100.00%  |
| 21  | 579       | 20701 | 22440 | +      | Acetylcholinesterase [Acanthamoeba castellanii mamavirus]                                    | 1207  | 100%        | 0.0       | 100.00%  |
| 22  | 70        | 22566 | 22778 | -      | putative membrane protein [Acanthamoeba castellanii mamavirus]                               | 135   | 100%        | 1,00E-39  | 100.00%  |
| 23  | 210       | 22837 | 23469 | +      | putative Fe2OG oxygenase family oxidoreductase [Acanthamoeba polyphaga mimivirus]            | 416   | 100%        | 3,00E-146 | 100.00%  |
| 24  | 343       | 23629 | 24660 | -      | KiIA N-domain protein [Acanthamoeba castellanii mamavirus]                                   | 689   | 100%        | 0.0       | 100.00%  |
| 25  | 52        | 24775 | 24933 | +      | orphan [Mimivirus reunion]                                                                   | 104   | 100%        | 6,00E-28  | 100.00%  |
| 26  | 365       | 24988 | 26085 | -      | putative ankryrin repeat protein [Acanthamoeba polyphaga mimivirus]                          | 741   | 100%        | 0.0       | 100.00%  |
| 27  | 213       | 26369 | 27010 | -      | hypothetical protein MIMI_gp0966 [Acanthamoeba polyphaga mimivirus]                          | 414   | 100%        | 2,00E-145 | 100.00%  |
| 28  | 361       | 27552 | 28637 | -      | putative ankryrin repeat protein [Acanthamoeba polyphaga mimivirus]                          | 720   | 100%        | 0.0       | 100.00%  |
| 29  | 109       | 28697 | 29026 | -      | hypothetical protein HIRU_515 [Hirudovirus strain Sangsue]                                   | 215   | 100%        | 2,00E-70  | 99.08%   |
| 30  | 54        | 29203 | 29367 | -      | hypothetical protein [Acanthamoeba castellanii mimivirus]                                    | 114   | 100%        | 6,00E-32  | 100.00%  |
| 31  | 101       | 29457 | 29762 | -      | hypothetical protein MIMI_gp0964 [Acanthamoeba polyphaga mimivirus]                          | 207   | 100%        | 3,00E-67  | 100.00%  |
| 32  | 161       | 29916 | 30401 | +      | hypothetical protein MIMI_gp0963 [Acanthamoeba polyphaga mimivirus]                          | 319   | 100%        | 9,00E-110 | 100.00%  |
| 33  | 201       | 30491 | 31096 | -      | hypothetical protein [Acanthamoeba castellanii mamavirus]                                    | 402   | 100%        | 3,00E-141 | 100.00%  |
| 34  | 347       | 31154 | 32197 | +      | putative ankryrin repeat protein [Acanthamoeba polyphaga mimivirus]                          | 637   | 92%         | 0.0       | 100.00%  |
| 35  | 332       | 32330 | 33328 | -      | putative ankryrin repeat protein [Acanthamoeba polyphaga mimivirus]                          | 682   | 100%        | 0.0       | 100.00%  |
| 36  | 698       | 33440 | 35536 | -      | putative endonuclease/exonuclease/phosphatase [Acanthamoeba polyphaga mimivirus]             | 1450  | 100%        | 0.0       | 100.00%  |
| 37  | 702       | 35791 | 37899 | +      | GMC oxidoreductase [Acanthamoeba castellanii mamavirus]                                      | 1449  | 100%        | 0.0       | 100.00%  |
| 38  | 269       | 38058 | 38867 | -      | hypothetical protein MIMI_gp0957 [Acanthamoeba polyphaga mimivirus]                          | 555   | 100%        | 0.0       | 100.00%  |
| 39  | 104       | 39054 | 39368 | +      | hypothetical protein MIMI_gp0956 [Acanthamoeba polyphaga mimivirus]                          | 198   | 100%        | 9,00E-64  | 100.00%  |
| 40  | 180       | 39453 | 39995 | -      | hypothetical protein MIMI_gp0955 [Acanthamoeba polyphaga mimivirus]                          | 357   | 100%        | 5,00E-124 | 100.00%  |
| 41  | 114       | 40091 | 40435 | -      | hypothetical protein MIMI_gp0954 [Acanthamoeba polyphaga mimivirus]                          | 231   | 100%        | 2,00E-76  | 100.00%  |
| 42  | 193       | 40436 | 41017 | -      | ankryrin repeat-containing protein [Acanthamoeba castellanii mamavirus]                      | 392   | 100%        | 8,00E-138 | 99.48%   |
| 43  | 271       | 41073 | 41888 | +      | hypothetical protein MIMI_gp0953 [Acanthamoeba polyphaga mimivirus]                          | 541   | 100%        | 0.0       | 100.00%  |
| 44  | 155       | 41959 | 42426 | +      | Transcription factor jumonji [Acanthamoeba castellanii mamavirus]                            | 312   | 100%        | 3,00E-107 | 100.00%  |
| 45  | 428       | 42492 | 43778 | +      | putative JmjC domain-containing protein [Acanthamoeba polyphaga mimivirus]                   | 858   | 100%        | 0.0       | 100.00%  |
| 46  | 72        | 43867 | 44085 | -      | putative ankryrin repeat protein [Hirudovirus strain Sangsue]                                | 140   | 100%        | 6,00E-42  | 98.61%   |
| 47  | 144       | 44235 | 44669 | +      | hypothetical protein MIMI_gp0951 [Acanthamoeba polyphaga mimivirus]                          | 286   | 100%        | 2,00E-97  | 100.00%  |
| 48  | 323       | 45082 | 46053 | +      | hypothetical protein [Samba virus]                                                           | 653   | 100%        | 0.0       | 100.00%  |
| 49  | 452       | 46125 | 47483 | -      | hypothetical protein MIMI_gp0949 [Acanthamoeba polyphaga mimivirus]                          | 912   | 100%        | 0.0       | 100.00%  |
| 50  | 538       | 47530 | 49146 | -      | hypothetical protein MIMI_gp0948 [Acanthamoeba polyphaga mimivirus]                          | 1066  | 100%        | 0.0       | 100.00%  |
| 51  | 187       | 49338 | 49901 | +      | hypothetical protein MIMI_gp0947 [Acanthamoeba polyphaga mimivirus]                          | 384   | 100%        | 1,00E-134 | 100.00%  |
| 52  | 255       | 50193 | 50960 | -      | putative ankryrin repeat protein [Acanthamoeba polyphaga mimivirus]                          | 520   | 100%        | 0.0       | 100.00%  |
| 53  | 483       | 51114 | 52565 | -      | KiIA N-terminal domain, N1R/P28 DNA binding protein [Acanthamoeba polyphaga lentilivirius]   | 974   | 100%        | 0.0       | 100.00%  |
| 54  | 171       | 52672 | 53187 | -      | putative outer membrane lipoprotein [Acanthamoeba castellanii mamavirus]                     | 342   | 100%        | 2,00E-118 | 100.00%  |
| 55  | 412       | 53317 | 54555 | +      | hypothetical protein [Acanthamoeba castellanii mamavirus]                                    | 820   | 100%        | 0.0       | 100.00%  |
| 56  | 317       | 54629 | 55582 | -      | ankryrin repeat-containing protein [Acanthamoeba castellanii mamavirus]                      | 638   | 100%        | 0.0       | 100.00%  |
| 57  | 178       | 55861 | 56397 | -      | hypothetical protein [Acanthamoeba castellanii mamavirus]                                    | 366   | 100%        | 8,00E-128 | 100.00%  |
| 58  | 468       | 56480 | 57886 | -      | ankryrin repeat-containing protein [Acanthamoeba castellanii mamavirus]                      | 942   | 100%        | 0.0       | 100.00%  |
| 59  | 340       | 58133 | 59155 | +      | hypothetical protein [Acanthamoeba castellanii mamavirus]                                    | 677   | 100%        | 0.0       | 100.00%  |
| 60  | 76        | 59233 | 59463 | +      | hypothetical protein [Acanthamoeba castellanii mamavirus]                                    | 154   | 100%        | 5,00E-47  | 100.00%  |
| 61  | 575       | 59567 | 61294 | -      | hypothetical protein [Acanthamoeba castellanii mamavirus]                                    | 1172  | 100%        | 0.0       | 100.00%  |
| 62  | 64        | 61369 | 61563 | -      | hypothetical protein [Acanthamoeba castellanii mamavirus]                                    | 125   | 100%        | 3,00E-36  | 100.00%  |
| 63  | 389       | 61712 | 62881 | +      | hypothetical protein [Acanthamoeba castellanii mamavirus]                                    | 758   | 98%         | 0.0       | 100.00%  |
| 64  | 426       | 62937 | 64217 | -      | ankryrin repeat-containing protein [Acanthamoeba castellanii mamavirus]                      | 861   | 100%        | 0.0       | 100.00%  |
| 65  | 201       | 64309 | 64914 | -      | ankryrin repeat-containing protein [Acanthamoeba castellanii mamavirus]                      | 415   | 100%        | 2,00E-146 | 100.00%  |
| 66  | 65        | 65139 | 65336 | -      | hypothetical protein [Mimivirus reunion]                                                     | 133   | 100%        | 4,00E-39  | 98.46%   |
| 67  | 247       | 65783 | 66526 | -      | hypothetical protein [Acanthamoeba castellanii mamavirus]                                    | 499   | 100%        | 5,00E-178 | 100.00%  |
| 68  | 191       | 66590 | 67165 | -      | BTB super family protein [Acanthamoeba castellanii mamavirus]                                | 379   | 100%        | 1,00E-132 | 100.00%  |
| 69  | 677       | 67211 | 69244 | -      | hypothetical protein HIRU_557 [Hirudovirus strain Sangsue]                                   | 1365  | 100%        | 0.0       | 100.00%  |
| 70  | 299       | 70282 | 71181 | +      | putative ankryrin repeat protein [Acanthamoeba polyphaga mimivirus]                          | 594   | 100%        | 0.0       | 100.00%  |
| 71  | 514       | 71284 | 72828 | +      | putative ankryrin repeat protein [Acanthamoeba polyphaga mimivirus]                          | 1027  | 100%        | 0.0       | 100.00%  |
| 72  | 310       | 73244 | 74176 | +      | hypothetical protein [Samba virus]                                                           | 624   | 100%        | 0.0       | 100.00%  |
| 73  | 212       | 74240 | 74878 | -      | hypothetical protein MIMI_gp0922 [Acanthamoeba polyphaga mimivirus]                          | 428   | 100%        | 3,00E-151 | 100.00%  |
| 74  | 106       | 74963 | 75283 | -      | hypothetical protein MIMI_gp0921 [Acanthamoeba polyphaga mimivirus]                          | 214   | 100%        | 7,00E-70  | 100.00%  |
| 75  | 315       | 75478 | 76425 | +      | hypothetical protein MIMI_gp0920 [Acanthamoeba polyphaga mimivirus]                          | 658   | 100%        | 0.0       | 100.00%  |
| 76  | 424       | 76490 | 77764 | -      | ankryrin repeat-containing protein [Acanthamoeba castellanii mamavirus]                      | 859   | 100%        | 0.0       | 100.00%  |
| 77  | 180       | 77840 | 78382 | -      | hypothetical protein MIMI_gp0918 [Acanthamoeba polyphaga mimivirus]                          | 371   | 100%        | 9,00E-130 | 100.00%  |
| 78  | 342       | 78682 | 79710 | -      | putative TPR repeat-containing protein [Acanthamoeba polyphaga mimivirus]                    | 693   | 100%        | 0.0       | 100.00%  |
| 79  | 123       | 79829 | 80200 | -      | hypothetical protein lvs_R749 [Acanthamoeba polyphaga lentilivirius]                         | 254   | 100%        | 2,00E-85  | 100.00%  |
| 80  | 241       | 80314 | 81039 | -      | putative transposase [Niemeyer virus]                                                        | 468   | 98%         | 1,00E-164 | 100.00%  |
| 81  | 393       | 81103 | 82284 | -      | putative deoxyribodipyrimidine photolyase-related protein [Acanthamoeba polyphaga mimivirus] | 793   | 100%        | 0.0       | 100.00%  |
| 82  | 100       | 82315 | 82617 | +      | hypothetical protein MIMI_gp0913 [Acanthamoeba polyphaga mimivirus]                          | 204   | 100%        | 3,00E-66  | 100.00%  |
| 83  | 513       | 82675 | 84216 | -      | putative sel1-like repeat-containing protein [Acanthamoeba polyphaga mimivirus]              | 1035  | 100%        | 0.0       | 100.00%  |
| 84  | 141       | 84289 | 84714 | -      | hypothetical protein MIMI_gp0911 [Acanthamoeba polyphaga mimivirus]                          | 288   | 100%        | 3,00E-98  | 100.00%  |
| 85  | 519       | 84781 | 86340 | -      | ankryrin repeat-containing protein [Acanthamoeba castellanii mamavirus]                      | 1047  | 100%        | 0.0       | 100.00%  |
| 86  | 100       | 86403 | 86705 | -      | ankryrin repeat protein [Samba virus]                                                        | 201   | 100%        | 4,00E-65  | 100.00%  |
| 87  | 545       | 87035 | 88672 | -      | putative transposase [Acanthamoeba castellanii mamavirus]                                    | 1114  | 100%        | 0.0       | 100.00%  |
| 88  | 191       | 88779 | 89354 | +      | putative site-specific integrase-resolvase [Acanthamoeba castellanii mamavirus]              | 381   | 100%        | 3,00E-133 | 100.00%  |
| 89  | 141       | 89402 | 89827 | -      | ankryrin repeat-containing protein [Acanthamoeba castellanii mamavirus]                      | 279   | 100%        | 1,00E-94  | 100.00%  |
| 90  | 440       | 89886 | 91208 | -      | putative ankryrin repeat protein [Acanthamoeba polyphaga mimivirus]                          | 899   | 100%        | 0.0       | 100.00%  |
| 91  | 312       | 91261 | 92199 | -      | Esterase lipase superfamily protein [Acanthamoeba castellanii mamavirus]                     | 642   | 100%        | 0.0       | 100.00%  |

|     |      |        |        |   |                                                                                                  |      |      |           |         |
|-----|------|--------|--------|---|--------------------------------------------------------------------------------------------------|------|------|-----------|---------|
| 92  | 85   | 92382  | 92639  | - | hypothetical protein [Acanthamoeba castellanii mamavirus]                                        | 165  | 100% | 3,00E-51  | 100.00% |
| 93  | 504  | 92593  | 94107  | - | putative BTB/POZ domain-containing protein [Acanthamoeba polyphaga mimivirus]                    | 1000 | 100% | 0.0       | 100.00% |
| 94  | 601  | 94246  | 96051  | - | putative ankyrin repeat protein [Acanthamoeba polyphaga mimivirus]                               | 1197 | 100% | 0.0       | 100.00% |
| 95  | 526  | 96201  | 97781  | - | ankyrin repeat-containing protein [Acanthamoeba castellanii mamavirus]                           | 1058 | 100% | 0.0       | 100.00% |
| 96  | 457  | 97888  | 99261  | - | hypothetical protein MIMI_gp0902 [Acanthamoeba polyphaga mimivirus]                              | 927  | 100% | 0.0       | 100.00% |
| 97  | 276  | 99402  | 100232 | - | ankyrin repeat-containing protein [Acanthamoeba castellanii mamavirus]                           | 563  | 100% | 0.0       | 100.00% |
| 98  | 626  | 100349 | 102229 | - | putative ankyrin repeat protein [Acanthamoeba polyphaga mimivirus]                               | 1251 | 100% | 0.0       | 100.00% |
| 99  | 148  | 102311 | 102757 | - | hypothetical protein [Acanthamoeba castellanii mamavirus]                                        | 297  | 100% | 1,00E-101 | 100.00% |
| 100 | 308  | 102812 | 103738 | - | ankyrin repeat-containing protein [Acanthamoeba castellanii mamavirus]                           | 613  | 100% | 0.0       | 100.00% |
| 101 | 262  | 103874 | 104662 | + | putative BTB/POZ domain-containing protein [Acanthamoeba polyphaga mimivirus]                    | 523  | 100% | 0.0       | 100.00% |
| 102 | 553  | 104787 | 106448 | - | glucose-methanol-choline oxidoreductase [Acanthamoeba polyphaga mimivirus]                       | 1139 | 100% | 0.0       | 100.00% |
| 103 | 1624 | 106701 | 111575 | - | putative serine/threonine-protein kinase/receptor [Acanthamoeba polyphaga mimivirus]             | 3356 | 100% | 0.0       | 100.00% |
| 104 | 477  | 111752 | 113185 | - | putativeBTB/POZ domain-containing protein [Acanthamoeba polyphaga mimivirus]                     | 963  | 100% | 0.0       | 100.00% |
| 105 | 433  | 113308 | 114609 | + | hypothetical protein [Acanthamoeba castellanii mamavirus]                                        | 900  | 100% | 0.0       | 100.00% |
| 106 | 78   | 114719 | 114955 | + | hypothetical protein MIMI_gp0892 [Acanthamoeba polyphaga mimivirus]                              | 165  | 100% | 2,00E-51  | 100.00% |
| 107 | 124  | 115013 | 115387 | - | hypothetical protein [Acanthamoeba castellanii mamavirus]                                        | 249  | 100% | 3,00E-83  | 100.00% |
| 108 | 297  | 115539 | 116432 | - | hypothetical protein MIMI_gp0890 [Acanthamoeba polyphaga mimivirus]                              | 607  | 100% | 0.0       | 100.00% |
| 109 | 1638 | 116584 | 121500 | - | putative serine/threonine-protein kinase/receptor [Acanthamoeba polyphaga mimivirus]             | 3401 | 100% | 0.0       | 100.00% |
| 110 | 311  | 121717 | 122652 | - | putative ankyrin repeat protein [Acanthamoeba polyphaga mimivirus]                               | 631  | 100% | 0.0       | 100.00% |
| 111 | 221  | 122712 | 123377 | - | putative 5'(3')-deoxyribonucleotidase [Acanthamoeba polyphaga mimivirus]                         | 452  | 100% | 3,00E-160 | 100.00% |
| 112 | 323  | 123527 | 124498 | + | putative proliferating cell nuclear antigen [Acanthamoeba polyphaga mimivirus]                   | 644  | 100% | 0.0       | 100.00% |
| 113 | 568  | 124599 | 126305 | - | hypothetical protein MIMI_gp0885 [Acanthamoeba polyphaga mimivirus]                              | 1183 | 100% | 0.0       | 100.00% |
| 114 | 556  | 126447 | 128117 | - | hypothetical protein MIMI_gp0884 [Acanthamoeba polyphaga mimivirus]                              | 1125 | 100% | 0.0       | 100.00% |
| 115 | 120  | 128237 | 128599 | - | hypothetical protein MIMI_gp0883 [Acanthamoeba polyphaga mimivirus]                              | 251  | 100% | 5,00E-84  | 100.00% |
| 116 | 438  | 128776 | 130092 | - | hypothetical protein MIMI_R819 [Acanthamoeba polyphaga mimivirus]                                | 902  | 100% | 0.0       | 100.00% |
| 117 | 1651 | 130241 | 135196 | - | putative serine/threonine-protein kinase/receptor [Acanthamoeba polyphaga mimivirus]             | 3415 | 100% | 0.0       | 100.00% |
| 118 | 142  | 135477 | 135905 | + | hypothetical protein [Samba virus]                                                               | 286  | 100% | 3,00E-97  | 100.00% |
| 119 | 198  | 135967 | 136563 | - | hypothetical protein [Acanthamoeba castellanii mamavirus]                                        | 404  | 100% | 2,00E-142 | 100.00% |
| 120 | 540  | 136647 | 138269 | - | putative sel1-like repeat-containing protein [Acanthamoeba polyphaga mimivirus]                  | 1104 | 100% | 0.0       | 100.00% |
| 121 | 305  | 138384 | 139301 | - | hypothetical protein MIMI_gp0877 [Acanthamoeba polyphaga mimivirus]                              | 628  | 100% | 0.0       | 100.00% |
| 122 | 102  | 139473 | 139781 | + | hypothetical protein MIMI_gp0876 [Acanthamoeba polyphaga mimivirus]                              | 192  | 100% | 2,00E-61  | 100.00% |
| 123 | 990  | 139958 | 142930 | - | putative ariadne-like ring finger protein [Acanthamoeba polyphaga mimivirus]                     | 2052 | 100% | 0.0       | 100.00% |
| 124 | 211  | 143016 | 143651 | - | putative ankyrin repeat protein [Acanthamoeba polyphaga mimivirus]                               | 421  | 100% | 2,00E-148 | 100.00% |
| 125 | 229  | 143733 | 144422 | - | hypothetical protein MIMI_gp0872 [Acanthamoeba polyphaga mimivirus]                              | 467  | 100% | 6,00E-166 | 100.00% |
| 126 | 169  | 144545 | 145054 | + | cytochrome P450 family protein [Acanthamoeba castellanii mamavirus]                              | 344  | 100% | 2,00E-119 | 100.00% |
| 127 | 543  | 145044 | 146675 | + | probable lanosterol 14-alpha demethylase [Acanthamoeba polyphaga mimivirus]                      | 1135 | 100% | 0.0       | 99.82%  |
| 128 | 447  | 146804 | 148147 | - | probable 7-dehydrocholesterol reductase [Acanthamoeba polyphaga mimivirus]                       | 915  | 100% | 0.0       | 100.00% |
| 129 | 108  | 148286 | 148612 | + | hypothetical protein [Acanthamoeba castellanii mamavirus]                                        | 223  | 100% | 2,00E-73  | 100.00% |
| 130 | 192  | 148664 | 149242 | - | hypothetical protein MIMI_gp0868 [Acanthamoeba polyphaga mimivirus]                              | 388  | 100% | 5,00E-136 | 100.00% |
| 131 | 186  | 149299 | 149859 | - | hypothetical protein MIMI_gp0867 [Acanthamoeba polyphaga mimivirus]                              | 364  | 100% | 1,00E-126 | 100.00% |
| 132 | 243  | 150000 | 150731 | + | putative metal-dependent phosphohydrolase, HD domain [Acanthamoeba polyphaga mimivirus]          | 506  | 100% | 0.0       | 100.00% |
| 133 | 247  | 150807 | 151550 | - | putative purine phosphorylase [Acanthamoeba polyphaga mimivirus]                                 | 512  | 100% | 0.0       | 100.00% |
| 134 | 131  | 151694 | 152089 | + | hypothetical protein MIMI_gp0864 [Acanthamoeba polyphaga mimivirus]                              | 262  | 100% | 3,00E-88  | 100.00% |
| 135 | 114  | 152227 | 152571 | - | hypothetical protein MIMI_gp0863 [Acanthamoeba polyphaga mimivirus]                              | 228  | 100% | 2,00E-75  | 100.00% |
| 136 | 201  | 152649 | 153254 | - | hypothetical protein [Acanthamoeba castellanii mamavirus]                                        | 390  | 96%  | 1,00E-136 | 100.00% |
| 137 | 269  | 153394 | 154203 | + | hypothetical protein lvs_L700 [Acanthamoeba polyphaga lentillevirus]                             | 552  | 100% | 0.0       | 100.00% |
| 138 | 445  | 154217 | 155554 | - | putative ankyrin repeat protein [Acanthamoeba polyphaga mimivirus]                               | 897  | 100% | 0.0       | 100.00% |
| 139 | 142  | 155682 | 156110 | + | hypothetical protein MIMI_gp0859 [Acanthamoeba polyphaga mimivirus]                              | 296  | 100% | 4,00E-101 | 100.00% |
| 140 | 1297 | 156205 | 160098 | - | RING-finger-containing E3 ubiquitin ligase [Acanthamoeba polyphaga mimivirus]                    | 2667 | 100% | 0.0       | 99.92%  |
| 141 | 363  | 160316 | 161407 | + | DNA primase small subunit [Acanthamoeba castellanii mamavirus]                                   | 729  | 100% | 0.0       | 100.00% |
| 142 | 224  | 161495 | 162169 | - | hypothetical protein [Acanthamoeba castellanii mamavirus]                                        | 458  | 100% | 1,00E-162 | 100.00% |
| 143 | 228  | 162314 | 163000 | + | hypothetical protein MIMI_gp0854 [Acanthamoeba polyphaga mimivirus]                              | 465  | 100% | 2,00E-165 | 100.00% |
| 144 | 287  | 163067 | 163930 | - | putative ankyrin repeat protein [Acanthamoeba polyphaga mimivirus]                               | 582  | 100% | 0.0       | 100.00% |
| 145 | 118  | 164027 | 164383 | - | hypothetical protein HIRU_S132 [Hirudovirus strain Sangsue]                                      | 236  | 100% | 3,00E-78  | 100.00% |
| 146 | 422  | 164594 | 165862 | - | putative ankyrin repeat protein [Acanthamoeba polyphaga mimivirus]                               | 859  | 100% | 0.0       | 100.00% |
| 147 | 498  | 166025 | 167521 | + | WD40 family protein [Acanthamoeba castellanii mamavirus]                                         | 1001 | 100% | 0.0       | 100.00% |
| 148 | 437  | 167599 | 168912 | - | putative ankyrin repeat protein [Acanthamoeba polyphaga mimivirus]                               | 895  | 100% | 0.0       | 100.00% |
| 149 | 492  | 169053 | 170531 | + | putative BTB/POZ domain and WD-repeat protein [Acanthamoeba polyphaga mimivirus]                 | 979  | 100% | 0.0       | 100.00% |
| 150 | 108  | 170600 | 170926 | - | hypothetical protein MIMI_gp0847 [Acanthamoeba polyphaga mimivirus]                              | 211  | 100% | 7,00E-69  | 100.00% |
| 151 | 433  | 170972 | 172273 | - | putative ankyrin repeat protein [Acanthamoeba polyphaga mimivirus]                               | 871  | 100% | 0.0       | 100.00% |
| 152 | 524  | 172382 | 173956 | + | WD40 family protein [Acanthamoeba castellanii mamavirus]                                         | 1063 | 100% | 0.0       | 100.00% |
| 153 | 126  | 174025 | 174405 | + | hypothetical protein [Acanthamoeba castellanii mamavirus]                                        | 259  | 100% | 2,00E-87  | 100.00% |
| 154 | 151  | 174652 | 175107 | + | hypothetical protein MIMI_gp0843 [Acanthamoeba polyphaga mimivirus]                              | 313  | 100% | 7,00E-108 | 100.00% |
| 155 | 289  | 175198 | 176067 | + | uncharacterized dTDP-4-dehydrohamose reductase domain protein [Acanthamoeba polyphaga mimivirus] | 602  | 100% | 0.0       | 100.00% |
| 156 | 103  | 176176 | 176487 | + | hypothetical protein MIMI_gp0841 [Acanthamoeba polyphaga mimivirus]                              | 208  | 100% | 8,00E-68  | 100.00% |
| 157 | 257  | 176588 | 177361 | + | hypothetical protein MIMI_gp0840 [Acanthamoeba polyphaga mimivirus]                              | 521  | 100% | 0.0       | 100.00% |
| 158 | 409  | 177393 | 178622 | - | ankyrin-containing protein [Hirudovirus strain Sangsue]                                          | 827  | 100% | 0.0       | 100.00% |
| 159 | 84   | 178834 | 179088 | - | putative chaperon protein DnaJ [Acanthamoeba polyphaga mimivirus]                                | 172  | 100% | 5,00E-54  | 100.00% |
| 160 | 342  | 179180 | 180208 | - | putative AAA-type ATPase [Acanthamoeba polyphaga mimivirus]                                      | 698  | 100% | 0.0       | 100.00% |
| 161 | 203  | 180364 | 180975 | + | putative PAN domain-containing protein [Acanthamoeba polyphaga mimivirus]                        | 416  | 100% | 9,00E-147 | 100.00% |
| 162 | 633  | 181059 | 182960 | + | putative ankyrin repeat protein [Acanthamoeba polyphaga mimivirus]                               | 1260 | 100% | 0.0       | 100.00% |
| 163 | 489  | 183059 | 184528 | - | putative BTB/POZ domain-containing protein [Acanthamoeba polyphaga mimivirus]                    | 995  | 100% | 0.0       | 100.00% |
| 164 | 295  | 184684 | 185571 | + | hypothetical protein MIMI_gp0833 [Acanthamoeba polyphaga mimivirus]                              | 594  | 100% | 0.0       | 100.00% |
| 165 | 190  | 185632 | 186204 | - | putative resolvase [Acanthamoeba polyphaga mimivirus]                                            | 385  | 100% | 6,00E-135 | 100.00% |
| 166 | 520  | 186309 | 187871 | + | putative transposase [Acanthamoeba polyphaga mimivirus]                                          | 1044 | 100% | 0.0       | 99.42%  |
| 167 | 77   | 188119 | 188352 | + | hypothetical protein MIMI_gp0830 [Acanthamoeba polyphaga mimivirus]                              | 158  | 100% | 1,00E-48  | 100.00% |
| 168 | 628  | 188442 | 190328 | + | putative ankyrin repeat protein [Acanthamoeba polyphaga mimivirus]                               | 1248 | 100% | 0.0       | 100.00% |
| 169 | 626  | 190452 | 192332 | + | putative ankyrin repeat protein [Acanthamoeba polyphaga mimivirus]                               | 1241 | 100% | 0.0       | 100.00% |
| 170 | 632  | 192407 | 194305 | + | putative ankyrin repeat protein [Acanthamoeba polyphaga mimivirus]                               | 1248 | 100% | 0.0       | 100.00% |
| 171 | 636  | 194414 | 196324 | + | putative ankyrin repeat protein [Acanthamoeba polyphaga mimivirus]                               | 1255 | 100% | 0.0       | 100.00% |
| 172 | 473  | 196498 | 197919 | - | putative BTB/POZ domain-containing protein [Acanthamoeba polyphaga mimivirus]                    | 949  | 100% | 0.0       | 100.00% |
| 173 | 647  | 198086 | 200029 | + | hypothetical protein lvs_L667 [Acanthamoeba polyphaga lentillevirus]                             | 1266 | 100% | 0.0       | 100.00% |
| 174 | 262  | 200140 | 200928 | + | hypothetical protein [Acanthamoeba castellanii mamavirus]                                        | 535  | 100% | 0.0       | 100.00% |
| 175 | 251  | 201009 | 201764 | - | hypothetical protein MIMI_gp0822 [Acanthamoeba polyphaga mimivirus]                              | 521  | 100% | 0.0       | 100.00% |
| 176 | 159  | 201913 | 202392 | + | hypothetical protein MIMI_gp0821 [Acanthamoeba polyphaga mimivirus]                              | 322  | 100% | 3,00E-111 | 100.00% |
| 177 | 490  | 202446 | 203918 | - | putative ankyrin repeat protein [Acanthamoeba polyphaga mimivirus]                               | 997  | 100% | 0.0       | 100.00% |
| 178 | 216  | 204102 | 204752 | - | hypothetical protein MIMI_gp0819 [Acanthamoeba polyphaga mimivirus]                              | 444  | 100% | 2,00E-157 | 100.00% |
| 179 | 74   | 204784 | 205008 | - | hypothetical protein [Acanthamoeba castellanii mimivirus]                                        | 150  | 100% | 1,00E-45  | 100.00% |
| 180 | 183  | 205108 | 205659 | - | putative 5'(3')-deoxyribonucleotidase [Acanthamoeba polyphaga mimivirus]                         | 372  | 100% | 4,00E-130 | 100.00% |
| 181 | 396  | 205794 | 206984 | - | putative F-box protein [Acanthamoeba polyphaga mimivirus]                                        | 813  | 100% | 0.0       | 100.00% |
| 182 | 180  | 207178 | 207720 | - | hypothetical protein [Acanthamoeba castellanii mamavirus]                                        | 368  | 100% | 1,00E-128 | 100.00% |
| 183 | 298  | 207783 | 208679 | - | putative Fe-S-cluster redox enzyme [Acanthamoeba castellanii mamavirus]                          | 619  | 100% | 0.0       | 100.00% |
| 184 | 130  | 208847 | 209239 | + | hypothetical protein MIMI_gp0815 [Acanthamoeba polyphaga mimivirus]                              | 258  | 100% | 2,00E-86  | 100.00% |
| 185 | 113  | 209205 | 209543 | + | hypothetical protein [Acanthamoeba castellanii mamavirus]                                        | 236  | 100% | 3,00E-75  | 100.00% |

|     |      |        |        |   |                                                                                                   |      |      |           |         |
|-----|------|--------|--------|---|---------------------------------------------------------------------------------------------------|------|------|-----------|---------|
| 186 | 104  | 209647 | 209961 | + | hypothetical protein [Acanthamoeba castellanii mamavirus]                                         | 194  | 100% | 6,00E-59  | 100.00% |
| 187 | 178  | 210002 | 210538 | + | hypothetical protein [Acanthamoeba castellanii mamavirus]                                         | 343  | 100% | 8,00E-119 | 99.44%  |
| 188 | 86   | 210616 | 210876 | - | hypothetical protein [Acanthamoeba castellanii mamavirus]                                         | 168  | 100% | 2,00E-52  | 100.00% |
| 189 | 751  | 210985 | 213240 | - | hypothetical protein [Acanthamoeba castellanii mamavirus]                                         | 1519 | 100% | 0.0       | 100.00% |
| 190 | 215  | 213341 | 213988 | - | hypothetical protein MIMI_gp0811 [Acanthamoeba polyphaga mimivirus]                               | 450  | 100% | 8,00E-160 | 100.00% |
| 191 | 149  | 214099 | 214548 | - | hypothetical protein MIMI_gp0810 [Acanthamoeba polyphaga mimivirus]                               | 293  | 100% | 4,00E-100 | 100.00% |
| 192 | 338  | 215751 | 216767 | + | hypothetical protein MIMI_gp0809 [Acanthamoeba polyphaga mimivirus]                               | 673  | 100% | 0.0       | 100.00% |
| 193 | 224  | 216867 | 217541 | - | putative homeobox protein [Acanthamoeba polyphaga mimivirus]                                      | 440  | 100% | 2,00E-155 | 100.00% |
| 194 | 1058 | 217750 | 220926 | - | ankyrin repeat-containing protein [Acanthamoeba castellanii mamavirus]                            | 2130 | 100% | 0.0       | 100.00% |
| 195 | 215  | 221061 | 221708 | - | hypothetical protein MIMI_gp0805 [Acanthamoeba polyphaga mimivirus]                               | 446  | 100% | 5,00E-158 | 100.00% |
| 196 | 292  | 221815 | 222693 | - | hypothetical protein [Acanthamoeba castellanii mamavirus]                                         | 582  | 100% | 0.0       | 100.00% |
| 197 | 194  | 222781 | 223365 | + | hypothetical protein [Acanthamoeba castellanii mamavirus]                                         | 390  | 100% | 6,00E-137 | 100.00% |
| 198 | 449  | 223478 | 224827 | + | putative BTB/POZ domain-containing protein [Acanthamoeba polyphaga mimivirus]                     | 901  | 100% | 0.0       | 100.00% |
| 199 | 81   | 224901 | 225146 | - | hypothetical protein [Acanthamoeba castellanii mamavirus]                                         | 159  | 100% | 6,00E-49  | 100.00% |
| 200 | 182  | 225209 | 225757 | - | hypothetical protein MIMI_gp0800 [Acanthamoeba polyphaga mimivirus]                               | 363  | 100% | 2,00E-126 | 100.00% |
| 201 | 187  | 225876 | 226439 | - | putative mitochondrial protein [Acanthamoeba polyphaga mimivirus]                                 | 396  | 100% | 2,00E-139 | 100.00% |
| 202 | 490  | 226485 | 227957 | - | WD40 family protein [Acanthamoeba castellanii mamavirus]                                          | 991  | 100% | 0.0       | 100.00% |
| 203 | 497  | 228028 | 229521 | - | WD40 family protein [Acanthamoeba castellanii mamavirus]                                          | 1007 | 100% | 0.0       | 100.00% |
| 204 | 248  | 229844 | 230590 | + | hypothetical protein MIMI_gp0796 [Acanthamoeba polyphaga mimivirus]                               | 511  | 100% | 0.0       | 100.00% |
| 205 | 276  | 230673 | 231503 | - | hypothetical protein [Acanthamoeba castellanii mamavirus]                                         | 554  | 100% | 0.0       | 100.00% |
| 206 | 446  | 231634 | 232974 | - | hypothetical protein MIMI_gp0794 [Acanthamoeba polyphaga mimivirus]                               | 920  | 100% | 0.0       | 100.00% |
| 207 | 652  | 233194 | 235152 | - | hypothetical protein [Acanthamoeba castellanii mamavirus]                                         | 1292 | 100% | 0.0       | 100.00% |
| 208 | 524  | 235349 | 236923 | + | ABC transporter ATP-binding domain protein [Acanthamoeba castellanii mamavirus]                   | 1062 | 100% | 0.0       | 100.00% |
| 209 | 188  | 236976 | 237542 | + | hypothetical protein [Acanthamoeba castellanii mamavirus]                                         | 392  | 100% | 1,00E-137 | 100.00% |
| 210 | 512  | 237515 | 239053 | - | putative BTB/POZ domain and WD-repeat protein [Acanthamoeba polyphaga mimivirus]                  | 1017 | 100% | 0.0       | 100.00% |
| 211 | 406  | 239146 | 240366 | - | putative CkQ-like protein [Acanthamoeba polyphaga mimivirus]                                      | 827  | 100% | 0.0       | 100.00% |
| 212 | 189  | 240503 | 241072 | + | hypothetical protein HIRU_5197 [Hirudovirus strain Sangsue]                                       | 384  | 100% | 2,00E-134 | 100.00% |
| 213 | 567  | 241174 | 242877 | + | hypothetical protein [Acanthamoeba castellanii mamavirus]                                         | 1185 | 100% | 0.0       | 100.00% |
| 214 | 284  | 242929 | 243783 | - | hypothetical protein MIMI_gp0786 [Acanthamoeba polyphaga mimivirus]                               | 554  | 100% | 0.0       | 100.00% |
| 215 | 251  | 243845 | 244600 | - | peptide chain release factor eRF1 [Samba virus]                                                   | 500  | 100% | 2,00E-178 | 99.60%  |
| 216 | 69   | 244638 | 244847 | - | peptide chain release factor 1 N [Hirudovirus strain Sangsue]                                     | 136  | 100% | 2,00E-40  | 98.55%  |
| 217 | 224  | 245141 | 245815 | + | hypothetical protein MIMI_gp0784 [Acanthamoeba polyphaga mimivirus]                               | 456  | 100% | 9,00E-162 | 100.00% |
| 218 | 218  | 245961 | 246617 | + | hypothetical protein [Acanthamoeba castellanii mamavirus]                                         | 436  | 100% | 5,00E-154 | 100.00% |
| 219 | 221  | 246694 | 247359 | + | hypothetical protein [Mimivirus reunion]                                                          | 445  | 100% | 1,00E-157 | 100.00% |
| 220 | 872  | 247450 | 250068 | - | putative bifunctional metalloprotease/ubiquitin-protein ligase [Acanthamoeba polyphaga mimivirus] | 1790 | 100% | 0.0       | 100.00% |
| 221 | 270  | 250227 | 251039 | - | putative chemotaxis protein CheD [Acanthamoeba polyphaga mimivirus]                               | 553  | 100% | 0.0       | 100.00% |
| 222 | 274  | 251088 | 251912 | + | endonuclease VIII-like protein [Acanthamoeba polyphaga mimivirus]                                 | 568  | 100% | 0.0       | 100.00% |
| 223 | 349  | 251953 | 253002 | + | hypothetical protein lvs_L626 [Acanthamoeba polyphaga lentillevirus]                              | 707  | 100% | 0.0       | 100.00% |
| 224 | 130  | 253030 | 253422 | - | hypothetical protein [Acanthamoeba castellanii mamavirus]                                         | 269  | 100% | 6,00E-91  | 100.00% |
| 225 | 206  | 253540 | 254160 | + | hypothetical protein MIMI_gp0776 [Acanthamoeba polyphaga mimivirus]                               | 415  | 100% | 3,00E-146 | 100.00% |
| 226 | 205  | 254231 | 254848 | + | putative glutamine amidotransferase-like protein [Acanthamoeba polyphaga mimivirus]               | 408  | 100% | 1,00E-143 | 100.00% |
| 227 | 275  | 254929 | 255756 | - | putative ankyrin repeat protein [Acanthamoeba polyphaga mimivirus]                                | 535  | 100% | 0.0       | 100.00% |
| 228 | 115  | 255795 | 256142 | - | hypothetical protein MIMI_gp0773 [Acanthamoeba polyphaga mimivirus]                               | 236  | 100% | 3,00E-78  | 100.00% |
| 229 | 214  | 256243 | 256887 | + | putative membrane protein [Acanthamoeba castellanii mamavirus]                                    | 412  | 100% | 5,00E-145 | 100.00% |
| 230 | 976  | 257077 | 260007 | - | hypothetical protein [Acanthamoeba castellanii mamavirus]                                         | 1904 | 100% | 0.0       | 100.00% |
| 231 | 530  | 260143 | 261735 | + | hypothetical protein MIMI_gp0770 [Acanthamoeba polyphaga mimivirus]                               | 1094 | 100% | 0.0       | 100.00% |
| 232 | 328  | 261857 | 262843 | + | hypothetical protein [Acanthamoeba castellanii mamavirus]                                         | 661  | 100% | 0.0       | 100.00% |
| 233 | 194  | 262923 | 263507 | - | hypothetical protein [Acanthamoeba castellanii mamavirus]                                         | 408  | 100% | 7,00E-144 | 100.00% |
| 234 | 388  | 263650 | 264816 | + | probable ubiquitin-conjugating enzyme E2 [Acanthamoeba polyphaga mimivirus]                       | 770  | 100% | 0.0       | 100.00% |
| 235 | 204  | 264942 | 265556 | - | uncharacterized phosphoglycerate mutase family protein [Acanthamoeba polyphaga mimivirus]         | 419  | 100% | 8,00E-148 | 100.00% |
| 236 | 281  | 265627 | 266472 | - | putative glycosyltransferase [Acanthamoeba castellanii mamavirus]                                 | 576  | 100% | 0.0       | 100.00% |
| 237 | 420  | 266518 | 267780 | - | hypothetical protein [Acanthamoeba castellanii mamavirus]                                         | 845  | 100% | 0.0       | 100.00% |
| 238 | 227  | 267933 | 268616 | - | hypothetical protein HIRU_S223 [Hirudovirus strain Sangsue]                                       | 420  | 100% | 1,00E-147 | 98.68%  |
| 239 | 565  | 269108 | 270805 | - | hypothetical protein [Acanthamoeba castellanii mamavirus]                                         | 1150 | 100% | 0.0       | 100.00% |
| 240 | 135  | 270850 | 271257 | - | hypothetical protein MIMI_gp0761 [Acanthamoeba polyphaga mimivirus]                               | 276  | 100% | 2,00E-93  | 100.00% |
| 241 | 764  | 271387 | 273681 | + | putative protein kinase [Acanthamoeba castellanii mamavirus]                                      | 1540 | 100% | 0.0       | 100.00% |
| 242 | 203  | 273730 | 274341 | + | hypothetical protein [Acanthamoeba castellanii mamavirus]                                         | 417  | 100% | 4,00E-147 | 100.00% |
| 243 | 401  | 274349 | 275554 | - | Serpin [Acanthamoeba castellanii mamavirus]                                                       | 816  | 100% | 0.0       | 100.00% |
| 244 | 455  | 275628 | 276995 | - | putative procollagen-lysine,2-oxoglutarate dioxygenase [Acanthamoeba polyphaga mimivirus]         | 941  | 100% | 0.0       | 100.00% |
| 245 | 300  | 277218 | 278120 | + | hypothetical protein [Acanthamoeba castellanii mamavirus]                                         | 607  | 100% | 0.0       | 100.00% |
| 246 | 375  | 278241 | 279368 | + | hypothetical protein [Acanthamoeba castellanii mamavirus]                                         | 748  | 100% | 0.0       | 100.00% |
| 247 | 63   | 279424 | 279615 | + | hypothetical protein MIMI_gp0754 [Acanthamoeba polyphaga mimivirus]                               | 128  | 100% | 3,00E-37  | 100.00% |
| 248 | 313  | 279692 | 280633 | + | hypothetical protein [Acanthamoeba castellanii mamavirus]                                         | 632  | 100% | 0.0       | 100.00% |
| 249 | 144  | 280646 | 281080 | - | hypothetical protein [Acanthamoeba castellanii mamavirus]                                         | 291  | 100% | 2,00E-99  | 100.00% |
| 250 | 127  | 281146 | 281529 | - | putative potassium channel protein [Hirudovirus strain Sangsue]                                   | 250  | 100% | 1,00E-83  | 98.43%  |
| 251 | 149  | 281507 | 281956 | - | probable methylated-DNA-protein-cysteine methyltransferase [Acanthamoeba polyphaga mimivirus]     | 307  | 100% | 2,00E-105 | 100.00% |
| 252 | 354  | 282029 | 283093 | - | hypothetical protein MIMI_gp0749 [Acanthamoeba polyphaga mimivirus]                               | 722  | 100% | 0.0       | 100.00% |
| 253 | 275  | 283164 | 283991 | - | hypothetical protein [Acanthamoeba castellanii mamavirus]                                         | 560  | 100% | 0.0       | 100.00% |
| 254 | 374  | 284156 | 285280 | + | hypothetical protein MIMI_gp0746 [Acanthamoeba polyphaga mimivirus]                               | 761  | 100% | 0.0       | 100.00% |
| 255 | 255  | 285346 | 286113 | - | probable UDP-N-acetylglucosamine pyrophosphorylase [Acanthamoeba polyphaga mimivirus]             | 508  | 100% | 0.0       | 100.00% |
| 256 | 236  | 286210 | 286920 | + | hypothetical protein MIMI_gp0744 [Acanthamoeba polyphaga mimivirus]                               | 464  | 100% | 8,00E-165 | 100.00% |
| 257 | 330  | 286979 | 287971 | + | putative UV damage endonuclease [Acanthamoeba castellanii mamavirus]                              | 681  | 100% | 0.0       | 100.00% |
| 258 | 219  | 288054 | 288713 | + | hypothetical protein [Acanthamoeba castellanii mamavirus]                                         | 432  | 100% | 1,00E-152 | 100.00% |
| 259 | 149  | 289680 | 290129 | - | hypothetical protein HIRU_S244 [Hirudovirus strain Sangsue]                                       | 289  | 100% | 3,00E-98  | 99.33%  |
| 260 | 333  | 290405 | 291406 | + | hypothetical protein [Acanthamoeba castellanii mamavirus]                                         | 659  | 100% | 0.0       | 100.00% |
| 261 | 192  | 291505 | 292083 | + | hypothetical protein [Acanthamoeba castellanii mamavirus]                                         | 384  | 100% | 1,00E-134 | 100.00% |
| 262 | 498  | 292061 | 293557 | + | Endonuclease/Exonuclease/phosphatase family protein [Acanthamoeba castellanii mamavirus]          | 991  | 100% | 0.0       | 100.00% |
| 263 | 222  | 293635 | 294303 | + | hypothetical protein [Acanthamoeba castellanii mamavirus]                                         | 457  | 100% | 2,00E-162 | 100.00% |
| 264 | 114  | 294381 | 294725 | + | hypothetical protein MIMI_gp0736 [Acanthamoeba polyphaga mimivirus]                               | 230  | 100% | 5,00E-76  | 100.00% |
| 265 | 151  | 295002 | 295457 | - | hypothetical protein MIMI_gp0734 [Acanthamoeba polyphaga mimivirus]                               | 302  | 100% | 2,00E-103 | 100.00% |
| 266 | 111  | 295521 | 295856 | - | hypothetical protein MIMI_gp0733 [Acanthamoeba polyphaga mimivirus]                               | 215  | 100% | 3,00E-70  | 100.00% |
| 267 | 694  | 295961 | 298045 | - | putative serine/threonine-protein kinase [Acanthamoeba polyphaga mimivirus]                       | 1407 | 100% | 0.0       | 100.00% |
| 268 | 255  | 298176 | 298943 | + | putative SET domain-containing protein [Acanthamoeba polyphaga mimivirus]                         | 521  | 100% | 0.0       | 100.00% |
| 269 | 93   | 299071 | 299352 | - | hypothetical protein [Samba virus]                                                                | 180  | 100% | 7,00E-57  | 100.00% |
| 270 | 60   | 299396 | 299578 | - | hypothetical protein MIMI_gp0729 [Acanthamoeba polyphaga mimivirus]                               | 117  | 100% | 6,00E-33  | 100.00% |
| 271 | 165  | 299672 | 300169 | + | hypothetical protein MIMI_gp0728 [Acanthamoeba polyphaga mimivirus]                               | 330  | 100% | 4,00E-114 | 100.00% |
| 272 | 472  | 300203 | 301621 | - | ankyrin repeat-containing protein [Acanthamoeba castellanii mamavirus]                            | 967  | 100% | 0.0       | 100.00% |
| 273 | 488  | 301689 | 303155 | + | hypothetical protein [Acanthamoeba castellanii mamavirus]                                         | 979  | 100% | 0.0       | 100.00% |
| 274 | 60   | 303476 | 303658 | - | orphan [Mimivirus reunion]                                                                        | 124  | 100% | 9,00E-36  | 100.00% |
| 275 | 66   | 303803 | 304003 | + | hypothetical protein MIMI_gp0725 [Acanthamoeba polyphaga mimivirus]                               | 125  | 100% | 5,00E-36  | 100.00% |
| 276 | 96   | 304049 | 304339 | + | hypothetical protein [Acanthamoeba polyphaga mimivirus]                                           | 188  | 100% | 4,00E-60  | 100.00% |
| 277 | 547  | 304472 | 306115 | - | putative serine/threonine-protein kinase [Acanthamoeba polyphaga mimivirus]                       | 1106 | 100% | 0.0       | 99.27%  |
| 278 | 111  | 306189 | 306524 | + | hypothetical protein MIMI_gp0723 [Acanthamoeba polyphaga mimivirus]                               | 237  | 100% | 5,00E-79  | 100.00% |
| 279 | 152  | 306646 | 307104 | + | hypothetical protein MIMI_gp0722 [Acanthamoeba polyphaga mimivirus]                               | 307  | 100% | 2,00E-105 | 100.00% |

|     |      |        |        |   |                                                                                                 |      |      |           |         |
|-----|------|--------|--------|---|-------------------------------------------------------------------------------------------------|------|------|-----------|---------|
| 280 | 539  | 307200 | 308819 | + | serine-threonine kinase [Acanthamoeba castellanii mamavirus]                                    | 1092 | 100% | 0.0       | 100.00% |
| 281 | 1916 | 308928 | 314678 | + | Collagen triple helix repeat containing protein [Acanthamoeba castellanii mamavirus]            | 3575 | 100% | 0.0       | 100.00% |
| 282 | 1312 | 314810 | 318748 | + | collagen triple helix repeat containing protein [Mimivirus Bombay]                              | 2467 | 100% | 0.0       | 98.78%  |
| 283 | 148  | 318810 | 319256 | - | hypothetical protein [Acanthamoeba castellanii mamavirus]                                       | 302  | 100% | 1,00E-103 | 100.00% |
| 284 | 59   | 319331 | 319510 | - | orphan [Mimivirus reunion]                                                                      | 120  | 100% | 2,00E-34  | 100.00% |
| 285 | 245  | 319603 | 320340 | + | putative ATPase [Acanthamoeba castellanii mamavirus]                                            | 492  | 100% | 1,00E-175 | 100.00% |
| 286 | 467  | 320417 | 321820 | - | putative oxidoreductase [Acanthamoeba polyphaga mimivirus]                                      | 978  | 100% | 0.0       | 100.00% |
| 287 | 162  | 321928 | 322416 | - | putative ankyrin repeat protein [Acanthamoeba polyphaga mimivirus]                              | 321  | 100% | 2,00E-110 | 100.00% |
| 288 | 600  | 322536 | 324338 | - | Arginyl-tRNA synthetase [Acanthamoeba castellanii mamavirus]                                    | 1211 | 100% | 0.0       | 100.00% |
| 289 | 462  | 324487 | 325875 | + | hypothetical protein [Acanthamoeba castellanii mamavirus]                                       | 951  | 100% | 0.0       | 100.00% |
| 290 | 73   | 325943 | 326164 | - | hypothetical protein [Acanthamoeba polyphaga mimivirus]                                         | 136  | 100% | 5,00E-40  | 100.00% |
| 291 | 211  | 326186 | 326821 | - | hypothetical protein [Acanthamoeba castellanii mamavirus]                                       | 421  | 100% | 3,00E-148 | 100.00% |
| 292 | 206  | 327097 | 327717 | - | hypothetical protein [Acanthamoeba castellanii mamavirus]                                       | 419  | 100% | 9,00E-148 | 100.00% |
| 293 | 508  | 327861 | 329387 | - | hypothetical protein [Acanthamoeba castellanii mamavirus]                                       | 1048 | 100% | 0.0       | 100.00% |
| 294 | 541  | 329536 | 331161 | - | hypothetical protein [Acanthamoeba castellanii mamavirus]                                       | 1108 | 100% | 0.0       | 100.00% |
| 295 | 204  | 331202 | 331816 | + | hypothetical protein [Acanthamoeba castellanii mamavirus]                                       | 403  | 100% | 1,00E-141 | 100.00% |
| 296 | 482  | 331906 | 333354 | - | FAD dependent oxidoreductase family protein [Acanthamoeba castellanii mamavirus]                | 993  | 100% | 0.0       | 100.00% |
| 297 | 324  | 333573 | 334547 | - | putative glycosyltransferase [Acanthamoeba polyphaga mimivirus]                                 | 667  | 100% | 0.0       | 100.00% |
| 298 | 600  | 334653 | 336455 | - | glycosyltransferase family 10 [Acanthamoeba castellanii mamavirus]                              | 1224 | 100% | 0.0       | 100.00% |
| 299 | 227  | 336526 | 337209 | - | hypothetical protein [Acanthamoeba castellanii mamavirus]                                       | 471  | 100% | 8,00E-168 | 100.00% |
| 300 | 352  | 337243 | 338301 | - | hypothetical protein [Acanthamoeba castellanii mamavirus]                                       | 706  | 100% | 0.0       | 100.00% |
| 301 | 493  | 338397 | 339878 | - | hypothetical protein [Acanthamoeba castellanii mamavirus]                                       | 1009 | 100% | 0.0       | 100.00% |
| 302 | 422  | 340003 | 341271 | - | hypothetical protein [Acanthamoeba castellanii mamavirus]                                       | 850  | 100% | 0.0       | 100.00% |
| 303 | 77   | 341330 | 341563 | - | hypothetical protein MIMI_gp0699 [Acanthamoeba polyphaga mimivirus]                             | 157  | 100% | 3,00E-48  | 100.00% |
| 304 | 281  | 341720 | 342565 | + | hypothetical protein [Acanthamoeba castellanii mamavirus]                                       | 559  | 100% | 0.0       | 100.00% |
| 305 | 400  | 342647 | 343849 | - | NHL repeat-containing protein [Acanthamoeba castellanii mamavirus]                              | 815  | 100% | 0.0       | 100.00% |
| 306 | 188  | 344099 | 344665 | + | hypothetical protein [Acanthamoeba polyphaga mimivirus]                                         | 357  | 100% | 5,00E-124 | 98.94%  |
| 307 | 273  | 344746 | 345567 | - | hypothetical protein MIMI_gp0695 [Acanthamoeba polyphaga mimivirus]                             | 540  | 100% | 0.0       | 100.00% |
| 308 | 407  | 345682 | 346905 | + | low complexity hypothetical protein [Acanthamoeba castellanii mamavirus]                        | 797  | 100% | 0.0       | 100.00% |
| 309 | 143  | 346902 | 347333 | - | phosphatidylethanolamine-binding protein [Acanthamoeba castellanii mamavirus]                   | 292  | 100% | 1,00E-99  | 100.00% |
| 310 | 359  | 347417 | 348496 | - | hypothetical protein [Acanthamoeba castellanii mamavirus]                                       | 683  | 100% | 0.0       | 100.00% |
| 311 | 526  | 348707 | 350287 | - | hypothetical protein [Acanthamoeba castellanii mamavirus]                                       | 1070 | 100% | 0.0       | 100.00% |
| 312 | 481  | 350414 | 351859 | - | hypothetical protein [Acanthamoeba castellanii mamavirus]                                       | 984  | 100% | 0.0       | 100.00% |
| 313 | 550  | 352222 | 353874 | - | Methionyl-tRNA synthetase [Acanthamoeba castellanii mamavirus]                                  | 1138 | 100% | 0.0       | 100.00% |
| 314 | 134  | 353884 | 354288 | - | hypothetical protein [Acanthamoeba castellanii mamavirus]                                       | 270  | 100% | 4,00E-91  | 100.00% |
| 315 | 153  | 354353 | 354814 | - | hypothetical protein [Acanthamoeba castellanii mamavirus]                                       | 311  | 100% | 9,00E-107 | 100.00% |
| 316 | 152  | 354955 | 355413 | + | hypothetical protein [Acanthamoeba castellanii mamavirus]                                       | 315  | 100% | 3,00E-108 | 100.00% |
| 317 | 394  | 355394 | 356578 | - | FNIP repeat-containing protein [Acanthamoeba castellanii mamavirus]                             | 798  | 100% | 0.0       | 100.00% |
| 318 | 70   | 356638 | 356850 | - | hypothetical protein MIMI_gp0684 [Acanthamoeba polyphaga mimivirus]                             | 142  | 100% | 1,00E-42  | 100.00% |
| 319 | 408  | 356889 | 358115 | - | hypothetical protein [Acanthamoeba castellanii mamavirus]                                       | 844  | 100% | 0.0       | 100.00% |
| 320 | 486  | 358217 | 359677 | - | ankyrin repeat-containing protein [Acanthamoeba castellanii mamavirus]                          | 982  | 100% | 0.0       | 100.00% |
| 321 | 58   | 359847 | 360023 | - | No significant similarity found                                                                 | -    | -    | -         | -       |
| 322 | 172  | 360466 | 360984 | + | Bulb-type mannose-specific lectin [Acanthamoeba castellanii mamavirus]                          | 347  | 100% | 5,00E-120 | 100.00% |
| 323 | 51   | 361047 | 361202 | - | orphan [Mimivirus reunion]                                                                      | 87.8 | 100% | 2,00E-21  | 100.00% |
| 324 | 321  | 361199 | 362164 | - | putative N-acylsphingosine amidohydrolase [Acanthamoeba castellanii mamavirus]                  | 656  | 100% | 0.0       | 100.00% |
| 325 | 227  | 362237 | 362920 | + | hypothetical protein [Acanthamoeba castellanii mamavirus]                                       | 458  | 100% | 1,00E-162 | 100.00% |
| 326 | 200  | 362974 | 363576 | + | uncharacterized transmembrane protein [Acanthamoeba polyphaga mimivirus]                        | 408  | 100% | 1,00E-143 | 100.00% |
| 327 | 322  | 363646 | 364614 | + | hypothetical protein MIMI_gp0676 [Acanthamoeba polyphaga mimivirus]                             | 650  | 100% | 0.0       | 100.00% |
| 328 | 89   | 364766 | 365035 | + | cyt-b5 [Acanthamoeba polyphaga mimivirus]                                                       | 181  | 100% | 2,00E-57  | 100.00% |
| 329 | 643  | 365139 | 367070 | - | hypothetical protein [Acanthamoeba castellanii mamavirus]                                       | 1256 | 100% | 0.0       | 100.00% |
| 330 | 599  | 367161 | 368960 | - | hypothetical protein [Acanthamoeba castellanii mamavirus]                                       | 1228 | 100% | 0.0       | 100.00% |
| 331 | 166  | 369265 | 369765 | - | GTP-binding protein-like protein [Acanthamoeba castellanii mamavirus]                           | 337  | 100% | 2,00E-116 | 100.00% |
| 332 | 479  | 369850 | 371289 | - | GTP binding elongation factor ef-Tu [Acanthamoeba castellanii mamavirus]                        | 969  | 100% | 0.0       | 100.00% |
| 333 | 269  | 372066 | 372875 | - | hypothetical protein [Acanthamoeba castellanii mamavirus]                                       | 543  | 100% | 0.0       | 100.00% |
| 334 | 212  | 373020 | 373658 | - | putative tyrosine-protein phosphatase [Acanthamoeba polyphaga mimivirus]                        | 439  | 100% | 8,00E-156 | 100.00% |
| 335 | 358  | 373807 | 374883 | + | putative N-myristoyltransferase [Hirudovirus strain Sangsue]                                    | 724  | 100% | 0.0       | 100.00% |
| 336 | 368  | 375004 | 376110 | + | Patatin phospholipase [Acanthamoeba castellanii mamavirus]                                      | 748  | 100% | 0.0       | 100.00% |
| 337 | 606  | 376146 | 377966 | + | putative glucosamine-fructose-6-phosphate aminotransferase [Acanthamoeba castellanii mamavirus] | 1254 | 100% | 0.0       | 100.00% |
| 338 | 592  | 377986 | 379764 | - | putative GTPase [Acanthamoeba castellanii mamavirus]                                            | 1188 | 100% | 0.0       | 100.00% |
| 339 | 170  | 379846 | 380358 | - | hypothetical protein MIMI_gp0663 [Acanthamoeba polyphaga mimivirus]                             | 357  | 100% | 1,00E-124 | 100.00% |
| 340 | 353  | 380532 | 381593 | - | hypothetical protein MIMI_gp0662 [Acanthamoeba polyphaga mimivirus]                             | 728  | 100% | 0.0       | 100.00% |
| 341 | 701  | 381796 | 383901 | + | Phosphoinositide 3-kinase [Acanthamoeba castellanii mamavirus]                                  | 1427 | 100% | 0.0       | 100.00% |
| 342 | 303  | 384097 | 385008 | - | Stomatin family protein [Acanthamoeba castellanii mamavirus]                                    | 616  | 100% | 0.0       | 100.00% |
| 343 | 386  | 385134 | 386294 | + | hypothetical protein [Acanthamoeba castellanii mamavirus]                                       | 788  | 100% | 0.0       | 100.00% |
| 344 | 160  | 386365 | 386847 | + | Mannose-6P isomerase [Acanthamoeba castellanii mamavirus]                                       | 332  | 100% | 4,00E-115 | 100.00% |
| 345 | 953  | 387009 | 389870 | + | P-loop ATPase/GTPase-containing domain protein [Acanthamoeba castellanii mamavirus]             | 1964 | 100% | 0.0       | 100.00% |
| 346 | 316  | 389947 | 390897 | - | Proline rich protein [Acanthamoeba castellanii mamavirus]                                       | 624  | 100% | 0.0       | 100.00% |
| 347 | 318  | 391175 | 392131 | + | hypothetical protein [Acanthamoeba castellanii mamavirus]                                       | 573  | 100% | 0.0       | 93.71%  |
| 348 | 246  | 392133 | 392873 | - | hypothetical protein [Acanthamoeba castellanii mamavirus]                                       | 495  | 100% | 1,00E-176 | 100.00% |
| 349 | 298  | 392927 | 393823 | - | hypothetical protein [Acanthamoeba castellanii mamavirus]                                       | 605  | 100% | 0.0       | 100.00% |
| 350 | 170  | 394011 | 394523 | + | hypothetical protein [Acanthamoeba castellanii mamavirus]                                       | 343  | 100% | 3,00E-119 | 100.00% |
| 351 | 234  | 394572 | 395276 | + | Cytophilin family protein [Acanthamoeba castellanii mamavirus]                                  | 478  | 100% | 2,00E-170 | 100.00% |
| 352 | 95   | 395341 | 395628 | - | hypothetical protein [Acanthamoeba castellanii mamavirus]                                       | 196  | 100% | 3,00E-63  | 100.00% |
| 353 | 375  | 395715 | 396842 | - | hypothetical protein [Acanthamoeba castellanii mamavirus]                                       | 760  | 100% | 0.0       | 100.00% |
| 354 | 309  | 396939 | 397868 | - | ankyrin repeat-containing protein [Acanthamoeba castellanii mamavirus]                          | 616  | 100% | 0.0       | 100.00% |
| 355 | 304  | 397970 | 398884 | - | ankyrin repeat-containing protein [Acanthamoeba castellanii mamavirus]                          | 614  | 100% | 0.0       | 100.00% |
| 356 | 303  | 398937 | 399848 | - | ankyrin repeat-containing protein [Acanthamoeba castellanii mamavirus]                          | 610  | 100% | 0.0       | 100.00% |
| 357 | 315  | 399940 | 400887 | - | ankyrin repeat-containing protein [Acanthamoeba castellanii mamavirus]                          | 630  | 100% | 0.0       | 100.00% |
| 358 | 358  | 400955 | 402031 | - | ankyrin repeat-containing protein [Acanthamoeba castellanii mamavirus]                          | 696  | 100% | 0.0       | 99.72%  |
| 359 | 304  | 402025 | 402939 | - | ankyrin repeat-containing protein [Acanthamoeba castellanii mamavirus]                          | 601  | 100% | 0.0       | 100.00% |
| 360 | 276  | 402998 | 403828 | - | hypothetical protein [Acanthamoeba castellanii mamavirus]                                       | 546  | 100% | 0.0       | 100.00% |
| 361 | 292  | 403888 | 404766 | - | Thiol oxidoreductase E1OR [Acanthamoeba castellanii mamavirus]                                  | 612  | 100% | 0.0       | 100.00% |
| 362 | 70   | 404884 | 405096 | - | hypothetical protein MIMI_gp0639 [Acanthamoeba polyphaga mimivirus]                             | 147  | 100% | 1,00E-44  | 100.00% |
| 363 | 294  | 405210 | 406094 | - | putative phospholipase/carboxylesterase family protein [Hirudovirus strain Sangsue]             | 594  | 100% | 0.0       | 100.00% |
| 364 | 390  | 406246 | 407418 | + | hypothetical protein MIMI_L594 [Acanthamoeba polyphaga mimivirus]                               | 797  | 100% | 0.0       | 100.00% |
| 365 | 242  | 407470 | 408198 | + | putative prollyl 4-hydroxylase [Acanthamoeba polyphaga mimivirus]                               | 503  | 100% | 8,00E-180 | 100.00% |
| 366 | 841  | 408301 | 410826 | - | RING-finger-containing E3 ubiquitin ligase [Acanthamoeba castellanii mamavirus]                 | 1712 | 100% | 0.0       | 100.00% |
| 367 | 259  | 410955 | 411734 | + | hypothetical protein MIMI_gp0634 [Acanthamoeba polyphaga mimivirus]                             | 531  | 100% | 0.0       | 100.00% |
| 368 | 190  | 411850 | 412422 | + | hypothetical protein MIMI_L590 [Acanthamoeba polyphaga mimivirus]                               | 395  | 100% | 7,00E-139 | 100.00% |
| 369 | 272  | 412554 | 413372 | + | ankyrin repeat-containing protein [Acanthamoeba castellanii mamavirus]                          | 555  | 100% | 0.0       | 100.00% |
| 370 | 397  | 413459 | 414652 | - | hypothetical protein [Acanthamoeba castellanii mamavirus]                                       | 825  | 100% | 0.0       | 100.00% |
| 371 | 185  | 414792 | 415349 | - | hypothetical protein [Acanthamoeba castellanii mamavirus]                                       | 389  | 100% | 1,00E-136 | 100.00% |
| 372 | 103  | 415495 | 415806 | + | hypothetical protein MIMI_gp0629 [Acanthamoeba polyphaga mimivirus]                             | 205  | 100% | 2,00E-66  | 100.00% |
| 373 | 107  | 415877 | 416200 | + | hypothetical protein [Acanthamoeba castellanii mamavirus]                                       | 210  | 100% | 3,00E-68  | 100.00% |

|     |      |        |        |   |                                                                                         |      |      |           |         |
|-----|------|--------|--------|---|-----------------------------------------------------------------------------------------|------|------|-----------|---------|
| 374 | 411  | 416248 | 417483 | - | hypothetical protein [Acanthamoeba castellanii mamavirus]                               | 848  | 100% | 0.0       | 100.00% |
| 375 | 104  | 417581 | 417895 | + | hypothetical protein MIMI_gp0626 [Acanthamoeba polyphaga mimivirus]                     | 207  | 100% | 3,00E-67  | 100.00% |
| 376 | 179  | 417918 | 418457 | - | hypothetical protein MIMI_gp0625 [Acanthamoeba polyphaga mimivirus]                     | 350  | 100% | 3,00E-121 | 100.00% |
| 377 | 741  | 418724 | 420949 | + | ATP-dependent helicase HrpA [Acanthamoeba castellanii mamavirus]                        | 1517 | 100% | 0.0       | 100.00% |
| 378 | 470  | 421003 | 422415 | - | ankyrin repeat-containing protein [Acanthamoeba castellanii mamavirus]                  | 947  | 100% | 0.0       | 100.00% |
| 379 | 463  | 422516 | 423907 | - | hypothetical protein [Acanthamoeba castellanii mamavirus]                               | 932  | 100% | 0.0       | 100.00% |
| 380 | 419  | 424005 | 425264 | - | ankyrin repeat-containing protein [Acanthamoeba castellanii mamavirus]                  | 847  | 100% | 0.0       | 100.00% |
| 381 | 104  | 425430 | 425744 | + | hypothetical protein [Acanthamoeba castellanii mamavirus]                               | 208  | 100% | 1,00E-67  | 100.00% |
| 382 | 296  | 425811 | 426701 | + | hypothetical protein [Acanthamoeba castellanii mamavirus]                               | 595  | 100% | 0.0       | 100.00% |
| 383 | 285  | 426746 | 427603 | + | hypothetical protein [Acanthamoeba castellanii mamavirus]                               | 570  | 100% | 0.0       | 100.00% |
| 384 | 273  | 427655 | 428476 | + | hypothetical protein [Acanthamoeba castellanii mamavirus]                               | 547  | 100% | 0.0       | 100.00% |
| 385 | 281  | 428514 | 429359 | + | hypothetical protein [Acanthamoeba castellanii mamavirus]                               | 562  | 100% | 0.0       | 100.00% |
| 386 | 485  | 429449 | 430906 | + | AAA family ATPase [Acanthamoeba castellanii mamavirus]                                  | 988  | 100% | 0.0       | 100.00% |
| 387 | 297  | 430951 | 431844 | - | Pat_ExoU_VipD-like protein [Acanthamoeba castellanii mamavirus]                         | 603  | 100% | 0.0       | 100.00% |
| 388 | 247  | 431902 | 432645 | - | hypothetical protein [Acanthamoeba castellanii mamavirus]                               | 493  | 100% | 9,00E-176 | 100.00% |
| 389 | 1031 | 432770 | 435865 | - | UvrD/REP helicase family protein [Acanthamoeba castellanii mamavirus]                   | 2103 | 100% | 0.0       | 100.00% |
| 390 | 320  | 435982 | 436944 | + | hypothetical protein [Acanthamoeba castellanii mamavirus]                               | 671  | 100% | 0.0       | 100.00% |
| 391 | 52   | 437066 | 437224 | - | hypothetical protein [Acanthamoeba polyphaga mimivirus]                                 | 67.4 | 69%  | 2,00E-11  | 91.67%  |
| 392 | 88   | 437199 | 437465 | - | hypothetical protein MIMI_gp0610 [Acanthamoeba polyphaga mimivirus]                     | 176  | 98%  | 5,00E-54  | 97.70%  |
| 393 | 126  | 437576 | 437956 | - | hypothetical protein [Acanthamoeba castellanii mamavirus]                               | 254  | 100% | 2,00E-85  | 100.00% |
| 394 | 75   | 437937 | 438164 | - | hypothetical protein [Acanthamoeba polyphaga mimivirus]                                 | 136  | 96%  | 8,00E-36  | 91.67%  |
| 395 | 144  | 438594 | 439028 | + | hypothetical protein [Acanthamoeba castellanii mamavirus]                               | 299  | 100% | 2,00E-102 | 100.00% |
| 396 | 353  | 439124 | 440185 | - | glutamine synthetase [Acanthamoeba castellanii mamavirus]                               | 739  | 100% | 0.0       | 100.00% |
| 397 | 137  | 440255 | 440668 | - | hypothetical protein [Acanthamoeba castellanii mamavirus]                               | 279  | 100% | 1,00E-94  | 100.00% |
| 398 | 573  | 440721 | 442442 | - | putative ATP-dependent RNA helicase [Acanthamoeba polyphaga mimivirus]                  | 1181 | 100% | 0.0       | 100.00% |
| 399 | 321  | 442554 | 443519 | - | hypothetical protein MIMI_gp0605 [Acanthamoeba polyphaga mimivirus]                     | 659  | 100% | 0.0       | 100.00% |
| 400 | 256  | 443772 | 444542 | - | hypothetical protein MIMI_gp0604 [Acanthamoeba polyphaga mimivirus]                     | 511  | 100% | 0.0       | 100.00% |
| 401 | 187  | 444671 | 445234 | + | Numo4 NHN endonuclease [Acanthamoeba castellanii mamavirus]                             | 384  | 100% | 1,00E-134 | 100.00% |
| 402 | 226  | 445390 | 446070 | - | Helixturn-helix XRE-family like protein [Acanthamoeba castellanii mamavirus]            | 459  | 100% | 3,00E-163 | 100.00% |
| 403 | 68   | 446134 | 446340 | - | putative membrane protein [Acanthamoeba castellanii mamavirus]                          | 128  | 100% | 3,00E-37  | 100.00% |
| 404 | 465  | 446404 | 447801 | - | hypothetical protein [Acanthamoeba castellanii mamavirus]                               | 911  | 100% | 0.0       | 100.00% |
| 405 | 160  | 447876 | 448358 | - | hypothetical protein [Acanthamoeba castellanii mamavirus]                               | 329  | 100% | 1,00E-113 | 100.00% |
| 406 | 277  | 448502 | 449335 | - | hypothetical protein [Acanthamoeba castellanii mamavirus]                               | 561  | 100% | 0.0       | 100.00% |
| 407 | 53   | 449310 | 449471 | - | No significant similarity found                                                         | -    | -    | -         | -       |
| 408 | 1351 | 449461 | 453516 | - | putative DNA repair protein [Acanthamoeba castellanii mamavirus]                        | 2723 | 100% | 0.0       | 100.00% |
| 409 | 402  | 453659 | 454867 | - | hypothetical protein [Acanthamoeba castellanii mamavirus]                               | 801  | 100% | 0.0       | 100.00% |
| 410 | 518  | 454964 | 456520 | - | hypothetical protein [Acanthamoeba castellanii mamavirus]                               | 1061 | 100% | 0.0       | 100.00% |
| 411 | 308  | 456560 | 457486 | + | hypothetical protein HIRU_5392 [Hirudovirus strain Sangsue]                             | 620  | 100% | 0.0       | 100.00% |
| 412 | 285  | 457545 | 458402 | - | hypothetical protein [Acanthamoeba castellanii mamavirus]                               | 573  | 100% | 0.0       | 100.00% |
| 413 | 167  | 458629 | 459132 | + | hypothetical protein MIMI_gp0592 [Acanthamoeba polyphaga mimivirus]                     | 301  | 100% | 1,00E-102 | 100.00% |
| 414 | 335  | 459739 | 460746 | - | hypothetical protein lvs_R476 [Acanthamoeba polyphaga lentilivirius]                    | 668  | 100% | 0.0       | 100.00% |
| 415 | 141  | 460823 | 461248 | - | Thioredoxin [Acanthamoeba castellanii mamavirus]                                        | 286  | 100% | 1,00E-97  | 100.00% |
| 416 | 122  | 461408 | 461776 | - | hypothetical protein lvs_R474 [Acanthamoeba polyphaga lentilivirius]                    | 253  | 100% | 6,00E-85  | 100.00% |
| 417 | 213  | 461939 | 462580 | - | MAMA_RS46 [Acanthamoeba castellanii mamavirus]                                          | 406  | 100% | 1,00E-142 | 100.00% |
| 418 | 282  | 462675 | 463523 | - | hypothetical protein [Acanthamoeba castellanii mamavirus]                               | 510  | 100% | 0.0       | 100.00% |
| 419 | 385  | 463668 | 464825 | + | hypothetical protein [Acanthamoeba castellanii mamavirus]                               | 766  | 100% | 0.0       | 99.48%  |
| 420 | 330  | 464863 | 465855 | + | ADP-ribosyltransferase [Acanthamoeba castellanii mamavirus]                             | 688  | 100% | 0.0       | 100.00% |
| 421 | 547  | 465926 | 467569 | - | hypothetical protein lvs_R470 [Acanthamoeba polyphaga lentilivirius]                    | 1095 | 100% | 0.0       | 100.00% |
| 422 | 306  | 467637 | 468557 | - | BTB family protein [Acanthamoeba castellanii mamavirus]                                 | 606  | 100% | 0.0       | 99.67%  |
| 423 | 159  | 468536 | 469015 | - | C-terminal divergent BTB domain-containing protein [Acanthamoeba castellanii mamavirus] | 321  | 100% | 1,00E-110 | 100.00% |
| 424 | 695  | 469153 | 471240 | + | VV18 helicase [Acanthamoeba polyphaga lentilivirius]                                    | 1432 | 100% | 0.0       | 100.00% |
| 425 | 298  | 471259 | 472155 | + | hypothetical protein [Acanthamoeba castellanii mamavirus]                               | 594  | 100% | 0.0       | 99.66%  |
| 426 | 74   | 472211 | 472435 | - | putative membrane protein [Acanthamoeba castellanii mamavirus]                          | 150  | 100% | 1,00E-45  | 100.00% |
| 427 | 60   | 472509 | 472691 | - | hypothetical protein MIMI_gp0579 [Acanthamoeba polyphaga mimivirus]                     | 114  | 100% | 8,00E-32  | 100.00% |
| 428 | 445  | 472780 | 474117 | + | putative ATP-dependent RNA helicase [Acanthamoeba polyphaga mimivirus]                  | 900  | 100% | 0.0       | 100.00% |
| 429 | 473  | 474224 | 475645 | + | hypothetical protein [Acanthamoeba castellanii mamavirus]                               | 959  | 100% | 0.0       | 100.00% |
| 430 | 448  | 475739 | 476248 | + | hypothetical protein [Acanthamoeba castellanii mamavirus]                               | 342  | 100% | 1,00E-118 | 100.00% |
| 431 | 507  | 476225 | 477748 | - | hypothetical protein [Acanthamoeba castellanii mamavirus]                               | 998  | 100% | 0.0       | 100.00% |
| 432 | 307  | 477916 | 478839 | + | nudix hydrolase [Acanthamoeba castellanii mamavirus]                                    | 623  | 100% | 0.0       | 100.00% |
| 433 | 508  | 478960 | 480486 | + | hypothetical protein [Acanthamoeba castellanii mamavirus]                               | 1038 | 100% | 0.0       | 100.00% |
| 434 | 468  | 480581 | 481987 | + | Cytochrome P450 [Acanthamoeba castellanii mamavirus]                                    | 947  | 100% | 0.0       | 100.00% |
| 435 | 294  | 482009 | 482893 | + | hypothetical protein [Acanthamoeba castellanii mamavirus]                               | 609  | 100% | 0.0       | 100.00% |
| 436 | 494  | 482978 | 484462 | - | putative DNA helicase [Acanthamoeba polyphaga mimivirus]                                | 1002 | 100% | 0.0       | 100.00% |
| 437 | 164  | 484606 | 485100 | + | hypothetical protein MIMI_gp0569 [Acanthamoeba polyphaga mimivirus]                     | 333  | 100% | 2,00E-115 | 100.00% |
| 438 | 785  | 485169 | 487526 | - | XRN 5'-3' exonuclease [Acanthamoeba castellanii mamavirus]                              | 1593 | 100% | 0.0       | 100.00% |
| 439 | 342  | 487592 | 488620 | - | putative triacylglycerol lipase [Acanthamoeba castellanii mamavirus]                    | 704  | 100% | 0.0       | 100.00% |
| 440 | 557  | 488696 | 490369 | - | hypothetical protein [Acanthamoeba castellanii mamavirus]                               | 1109 | 100% | 0.0       | 100.00% |
| 441 | 379  | 490556 | 491695 | + | putative divergent NUDIX hydrolase [Acanthamoeba castellanii mamavirus]                 | 771  | 100% | 0.0       | 100.00% |
| 442 | 118  | 491946 | 492302 | + | Integral membrane protein [Acanthamoeba castellanii mamavirus]                          | 235  | 100% | 3,00E-77  | 100.00% |
| 443 | 264  | 492292 | 493086 | - | hypothetical protein [Acanthamoeba castellanii mamavirus]                               | 520  | 100% | 0.0       | 100.00% |
| 444 | 869  | 493187 | 495796 | - | ubiquitin-conjugating enzyme E2 [Acanthamoeba castellanii mamavirus]                    | 1798 | 100% | 0.0       | 100.00% |
| 445 | 546  | 495930 | 497570 | - | hypothetical protein lvs_R450 [Acanthamoeba polyphaga lentilivirius]                    | 1118 | 99%  | 0.0       | 100.00% |
| 446 | 828  | 497699 | 500185 | + | BTB family protein [Acanthamoeba castellanii mamavirus]                                 | 1648 | 100% | 0.0       | 100.00% |
| 447 | 615  | 500214 | 502061 | - | putative peptidase [Acanthamoeba castellanii mamavirus]                                 | 1243 | 100% | 0.0       | 100.00% |
| 448 | 453  | 502253 | 503614 | - | Serine/Threonine protein kinase [Acanthamoeba castellanii mamavirus]                    | 919  | 100% | 0.0       | 100.00% |
| 449 | 221  | 503706 | 504371 | + | hypothetical protein MIMI_gp0557 [Acanthamoeba polyphaga mimivirus]                     | 432  | 100% | 1,00E-152 | 100.00% |
| 450 | 650  | 504414 | 506366 | + | hypothetical protein [Acanthamoeba castellanii mamavirus]                               | 1282 | 100% | 0.0       | 100.00% |
| 451 | 729  | 506448 | 508637 | + | hypothetical protein [Acanthamoeba castellanii mamavirus]                               | 1443 | 100% | 0.0       | 100.00% |
| 452 | 209  | 508640 | 509269 | - | hypothetical protein MIMI_gp0554 [Acanthamoeba polyphaga mimivirus]                     | 397  | 100% | 3,00E-139 | 100.00% |
| 453 | 93   | 509341 | 509622 | - | hypothetical protein MIMI_gp0553 [Acanthamoeba polyphaga mimivirus]                     | 192  | 100% | 1,00E-61  | 100.00% |
| 454 | 168  | 509754 | 510260 | - | hypothetical protein MIMI_gp0552 [Acanthamoeba polyphaga mimivirus]                     | 332  | 100% | 8,00E-115 | 100.00% |
| 455 | 193  | 510356 | 510937 | - | Deoxynucleotide monophosphate kinase [Acanthamoeba castellanii mamavirus]               | 405  | 100% | 9,00E-143 | 100.00% |
| 456 | 788  | 511077 | 513443 | + | ftsI methyltransferase domain-containing protein 1 [Acanthamoeba castellanii mamavirus] | 1599 | 100% | 0.0       | 100.00% |
| 457 | 363  | 513487 | 514578 | - | putative replication factor C small subunit [Acanthamoeba polyphaga mimivirus]          | 736  | 100% | 0.0       | 100.00% |
| 458 | 280  | 514729 | 515571 | + | putative metallo-dependent phosphatase [Acanthamoeba polyphaga mimivirus]               | 560  | 100% | 0.0       | 100.00% |
| 459 | 335  | 515640 | 516647 | - | putative SWIB domain-containing protein [Acanthamoeba polyphaga mimivirus]              | 647  | 100% | 0.0       | 100.00% |
| 460 | 259  | 516754 | 517533 | + | hypothetical protein MIMI_gp0546 [Acanthamoeba polyphaga mimivirus]                     | 520  | 100% | 0.0       | 100.00% |
| 461 | 320  | 517597 | 518559 | - | hypothetical protein MIMI_gp0545 [Acanthamoeba polyphaga mimivirus]                     | 650  | 100% | 0.0       | 100.00% |
| 462 | 405  | 518745 | 519962 | - | hypothetical protein [Acanthamoeba castellanii mamavirus]                               | 811  | 100% | 0.0       | 100.00% |
| 463 | 406  | 520185 | 521405 | + | hypothetical protein [Acanthamoeba castellanii mamavirus]                               | 811  | 100% | 0.0       | 100.00% |
| 464 | 232  | 521523 | 522221 | - | hypothetical protein [Acanthamoeba castellanii mamavirus]                               | 465  | 100% | 3,00E-165 | 100.00% |
| 465 | 967  | 522334 | 525237 | - | DNA directed RNA polymerase subunit 1 [Acanthamoeba polyphaga mimivirus]                | 1982 | 100% | 0.0       | 99.90%  |
| 466 | 256  | 525569 | 526339 | - | Group I intron endonuclease [Acanthamoeba castellanii mamavirus]                        | 532  | 100% | 0.0       | 100.00% |
| 467 | 514  | 526660 | 528204 | - | DNA directed RNA polymerase (II) subunit 1 [Acanthamoeba castellanii mamavirus]         | 811  | 100% | 0.0       | 100.00% |

|     |      |        |        |   |                                                                                                                      |      |      |           |         |
|-----|------|--------|--------|---|----------------------------------------------------------------------------------------------------------------------|------|------|-----------|---------|
| 468 | 83   | 528337 | 528588 | + | hypothetical protein HIRU_5447 [Hirudovirus strain Sangsue]                                                          | 166  | 100% | 1,00E-51  | 100.00% |
| 469 | 183  | 528585 | 529136 | - | hypothetical protein [Acanthamoeba polyphaga mimivirus]                                                              | 373  | 100% | 2,00E-130 | 100.00% |
| 470 | 110  | 529238 | 529570 | - | hypothetical protein [Acanthamoeba castellanii mamavirus]                                                            | 215  | 100% | 2,00E-70  | 100.00% |
| 471 | 344  | 529781 | 530815 | + | putative replication factor C small subunit [Acanthamoeba polyphaga mimivirus]                                       | 700  | 100% | 0.0       | 100.00% |
| 472 | 422  | 530914 | 532182 | + | probable zinc-type alcohol dehydrogenase-like protein [Acanthamoeba polyphaga mimivirus]                             | 875  | 100% | 0.0       | 100.00% |
| 473 | 563  | 532249 | 533940 | - | bifunctional dihydrofolate reductase-thymidylate synthase [Acanthamoeba polyphaga mimivirus]                         | 1169 | 100% | 0.0       | 100.00% |
| 474 | 264  | 534100 | 534894 | + | Translation initiation factor 4E [Acanthamoeba castellanii mamavirus]                                                | 540  | 100% | 0.0       | 100.00% |
| 475 | 140  | 534910 | 535332 | - | hypothetical protein [Acanthamoeba castellanii mamavirus]                                                            | 279  | 100% | 9,00E-95  | 100.00% |
| 476 | 273  | 535425 | 536246 | + | hypothetical protein [Acanthamoeba castellanii mamavirus]                                                            | 550  | 100% | 0.0       | 100.00% |
| 477 | 464  | 536297 | 537691 | - | probable DNA polymerase sliding clamp [Acanthamoeba polyphaga mimivirus]                                             | 928  | 100% | 0.0       | 99.78%  |
| 478 | 179  | 537852 | 538391 | + | hypothetical protein MIMI_gp0531 [Acanthamoeba polyphaga mimivirus]                                                  | 368  | 100% | 1,00E-128 | 100.00% |
| 479 | 247  | 538437 | 539180 | + | hypothetical protein [Acanthamoeba castellanii mamavirus]                                                            | 492  | 100% | 2,00E-175 | 100.00% |
| 480 | 511  | 539260 | 540795 | + | hypothetical protein MIMI_gp0529 [Acanthamoeba polyphaga mimivirus]                                                  | 1020 | 100% | 0.0       | 100.00% |
| 481 | 82   | 540872 | 541120 | + | hypothetical protein MIMI_gp0528 [Acanthamoeba polyphaga mimivirus]                                                  | 164  | 100% | 5,00E-51  | 100.00% |
| 482 | 221  | 541195 | 541860 | - | hypothetical protein MIMI_gp0527 [Acanthamoeba polyphaga mimivirus]                                                  | 456  | 100% | 7,00E-162 | 100.00% |
| 483 | 559  | 542094 | 543773 | + | hypothetical protein [Acanthamoeba castellanii mamavirus]                                                            | 1135 | 100% | 0.0       | 100.00% |
| 484 | 93   | 543919 | 544200 | + | hypothetical protein MIMI_gp0525 [Acanthamoeba polyphaga mimivirus]                                                  | 182  | 100% | 7,00E-58  | 100.00% |
| 485 | 330  | 544298 | 545290 | + | hypothetical protein [Acanthamoeba castellanii mamavirus]                                                            | 650  | 100% | 0.0       | 100.00% |
| 486 | 223  | 545342 | 546013 | - | putative PAN domain-containing protein [Acanthamoeba polyphaga mimivirus]                                            | 458  | 100% | 7,00E-163 | 100.00% |
| 487 | 170  | 546434 | 546946 | + | hypothetical protein MIMI_gp0521 [Acanthamoeba polyphaga mimivirus]                                                  | 350  | 100% | 6,00E-122 | 100.00% |
| 488 | 1908 | 547116 | 552842 | + | ankyrin repeat-containing protein [Acanthamoeba castellanii mamavirus]                                               | 3835 | 100% | 0.0       | 100.00% |
| 489 | 408  | 552972 | 554198 | + | putative ankyrin repeat protein [Acanthamoeba polyphaga mimivirus]                                                   | 816  | 100% | 0.0       | 100.00% |
| 490 | 82   | 554249 | 554497 | + | hypothetical protein MIMI_gp0518 [Acanthamoeba polyphaga mimivirus]                                                  | 156  | 100% | 1,00E-47  | 100.00% |
| 491 | 100  | 554899 | 555201 | + | ankyrin repeat-containing protein [Acanthamoeba castellanii mamavirus]                                               | 201  | 100% | 8,00E-65  | 99.00%  |
| 492 | 902  | 555261 | 557969 | - | hypothetical protein [Acanthamoeba castellanii mamavirus]                                                            | 1780 | 100% | 0.0       | 100.00% |
| 493 | 1263 | 558062 | 561853 | - | Topoisomerase II [Acanthamoeba castellanii mamavirus]                                                                | 2583 | 100% | 0.0       | 100.00% |
| 494 | 251  | 562073 | 562828 | + | Phosphoribosyl-ATP pyrophosphohydrolase-domain containing protein [two domains] [Acanthamoeba castellanii mamavirus] | 513  | 100% | 0.0       | 100.00% |
| 495 | 370  | 562959 | 564071 | + | putative replication factor C small subunit [Acanthamoeba polyphaga mimivirus]                                       | 751  | 100% | 0.0       | 100.00% |
| 496 | 311  | 564216 | 565151 | + | Cathepsin B, cysteine protease [Acanthamoeba castellanii mamavirus]                                                  | 644  | 100% | 0.0       | 100.00% |
| 497 | 91   | 565216 | 565491 | - | hypothetical protein MIMI_gp0511 [Acanthamoeba polyphaga mimivirus]                                                  | 170  | 100% | 7,00E-53  | 100.00% |
| 498 | 855  | 565712 | 568279 | - | AAA family ATPase [Acanthamoeba castellanii mamavirus]                                                               | 1730 | 100% | 0.0       | 100.00% |
| 499 | 550  | 568402 | 570054 | - | asparagine synthase [Acanthamoeba castellanii mamavirus]                                                             | 1136 | 100% | 0.0       | 100.00% |
| 500 | 417  | 570142 | 571395 | - | hypothetical protein [Acanthamoeba castellanii mamavirus]                                                            | 842  | 100% | 0.0       | 100.00% |
| 501 | 236  | 571441 | 572151 | - | hypothetical protein [Acanthamoeba castellanii mamavirus]                                                            | 476  | 100% | 3,00E-169 | 100.00% |
| 502 | 1700 | 572265 | 577367 | - | hypothetical protein [Acanthamoeba castellanii mamavirus]                                                            | 3431 | 100% | 0.0       | 100.00% |
| 503 | 401  | 577551 | 578756 | + | hypothetical protein [Acanthamoeba castellanii mamavirus]                                                            | 804  | 100% | 0.0       | 100.00% |
| 504 | 357  | 578840 | 579913 | - | DNA directed RNA polymerase subunit L [Acanthamoeba castellanii mamavirus]                                           | 725  | 100% | 0.0       | 100.00% |
| 505 | 403  | 580042 | 581253 | + | Polynucleotide phosphatase/kinase [Acanthamoeba castellanii mamavirus]                                               | 823  | 100% | 0.0       | 100.00% |
| 506 | 212  | 581256 | 581894 | - | hypothetical protein HIRU_5485 [Hirudovirus strain Sangsue]                                                          | 431  | 100% | 1,00E-152 | 100.00% |
| 507 | 321  | 581959 | 582924 | - | hypothetical protein MIMI_gp0501 [Acanthamoeba polyphaga mimivirus]                                                  | 649  | 100% | 0.0       | 100.00% |
| 508 | 395  | 583069 | 584256 | - | hypothetical protein MIMI_gp0500 [Acanthamoeba polyphaga mimivirus]                                                  | 791  | 100% | 0.0       | 100.00% |
| 509 | 180  | 584371 | 584913 | - | hypothetical protein MIMI_gp0499 [Acanthamoeba polyphaga mimivirus]                                                  | 366  | 100% | 9,00E-128 | 100.00% |
| 510 | 106  | 584979 | 585299 | - | protein translation factor SUI1-like protein [Acanthamoeba polyphaga mimivirus]                                      | 215  | 100% | 3,00E-70  | 100.00% |
| 511 | 293  | 585339 | 586220 | - | hypothetical protein MIMI_gp0497 [Acanthamoeba polyphaga mimivirus]                                                  | 582  | 100% | 0.0       | 100.00% |
| 512 | 200  | 586407 | 587009 | + | hypothetical protein MIMI_gp0496 [Acanthamoeba polyphaga mimivirus]                                                  | 404  | 100% | 6,00E-142 | 100.00% |
| 513 | 209  | 587092 | 587721 | + | hypothetical protein MIMI_gp0495 [Acanthamoeba polyphaga mimivirus]                                                  | 432  | 100% | 4,00E-153 | 100.00% |
| 514 | 158  | 587849 | 588325 | + | probable ubiquitin-conjugating enzyme E2 [Acanthamoeba polyphaga mimivirus]                                          | 317  | 100% | 5,00E-109 | 100.00% |
| 515 | 194  | 588408 | 588992 | - | hypothetical protein MIMI_gp0493 [Acanthamoeba polyphaga mimivirus]                                                  | 405  | 100% | 5,00E-143 | 100.00% |
| 516 | 524  | 589157 | 590731 | - | putative translation initiation factor 4a [Acanthamoeba polyphaga mimivirus]                                         | 1085 | 100% | 0.0       | 100.00% |
| 517 | 189  | 590850 | 591419 | - | hypothetical protein MIMI_gp0491 [Acanthamoeba polyphaga mimivirus]                                                  | 400  | 100% | 8,00E-141 | 100.00% |
| 518 | 175  | 591535 | 592062 | + | hypothetical protein MIMI_gp0490 [Acanthamoeba polyphaga mimivirus]                                                  | 348  | 100% | 5,00E-121 | 100.00% |
| 519 | 230  | 592089 | 592781 | - | hypothetical protein MIMI_gp0489 [Acanthamoeba polyphaga mimivirus]                                                  | 467  | 100% | 6,00E-166 | 100.00% |
| 520 | 1257 | 592906 | 596679 | + | hypothetical protein [Acanthamoeba castellanii mamavirus]                                                            | 2579 | 100% | 0.0       | 100.00% |
| 521 | 367  | 596774 | 597877 | - | TATA-box-binding protein-like protein [Acanthamoeba polyphaga mimivirus]                                             | 734  | 100% | 0.0       | 100.00% |
| 522 | 502  | 598015 | 599523 | + | hypothetical protein [Acanthamoeba polyphaga mimivirus]                                                              | 966  | 100% | 0.0       | 100.00% |
| 523 | 410  | 599644 | 600876 | + | Holliday junction resolvase [Acanthamoeba castellanii mamavirus]                                                     | 827  | 100% | 0.0       | 100.00% |
| 524 | 355  | 600937 | 602004 | - | putative viral transcription factor [Acanthamoeba polyphaga mimivirus]                                               | 723  | 100% | 0.0       | 100.00% |
| 525 | 661  | 602089 | 604074 | - | hypothetical protein MIMI_gp0482 [Acanthamoeba polyphaga mimivirus]                                                  | 1344 | 100% | 0.0       | 99.85%  |
| 526 | 57   | 604084 | 604257 | - | orphan [Mimivirus reunion]                                                                                           | 112  | 100% | 5,00E-31  | 98.25%  |
| 527 | 222  | 604306 | 604974 | + | hypothetical protein MIMI_gp0481 [Acanthamoeba polyphaga mimivirus]                                                  | 442  | 100% | 2,00E-156 | 100.00% |
| 528 | 123  | 604975 | 605346 | - | hypothetical protein MIMI_gp0480 [Acanthamoeba polyphaga mimivirus]                                                  | 255  | 100% | 1,00E-85  | 100.00% |
| 529 | 332  | 605496 | 606494 | + | putative patatin-like phospholipase [Acanthamoeba polyphaga mimivirus]                                               | 669  | 100% | 0.0       | 100.00% |
| 530 | 368  | 606549 | 607655 | - | Chaperone protein DnaJ [Acanthamoeba castellanii mamavirus]                                                          | 751  | 100% | 0.0       | 100.00% |
| 531 | 513  | 607757 | 609298 | + | putative ADP-ribosyl glycohydrolase [Acanthamoeba polyphaga mimivirus]                                               | 1059 | 100% | 0.0       | 100.00% |
| 532 | 164  | 609392 | 609886 | - | thioredoxin domain-containing protein [Acanthamoeba polyphaga mimivirus]                                             | 334  | 100% | 1,00E-115 | 100.00% |
| 533 | 1259 | 610059 | 613838 | + | hypothetical protein [Acanthamoeba castellanii mamavirus]                                                            | 2583 | 100% | 0.0       | 100.00% |
| 534 | 512  | 613935 | 615473 | - | probable capsid protein 4 [Acanthamoeba polyphaga mimivirus]                                                         | 1063 | 100% | 0.0       | 100.00% |
| 535 | 2156 | 615566 | 622036 | - | Capsid protein [Acanthamoeba castellanii mamavirus]                                                                  | 4319 | 100% | 0.0       | 100.00% |
| 536 | 591  | 622108 | 623883 | - | Capsid protein [Acanthamoeba castellanii mamavirus]                                                                  | 1206 | 100% | 0.0       | 100.00% |
| 537 | 200  | 624005 | 624607 | + | membrane protein [Acanthamoeba castellanii mamavirus]                                                                | 400  | 100% | 1,00E-140 | 100.00% |
| 538 | 134  | 624660 | 625064 | - | hypothetical protein [Acanthamoeba castellanii mamavirus]                                                            | 269  | 100% | 7,00E-91  | 100.00% |
| 539 | 284  | 625133 | 625987 | + | VV A32 virion packaging ATPase [Acanthamoeba polyphaga mimivirus]                                                    | 590  | 100% | 0.0       | 100.00% |
| 540 | 276  | 625977 | 626807 | - | Serine/Threonine protein kinase [Acanthamoeba castellanii mamavirus]                                                 | 543  | 100% | 0.0       | 100.00% |
| 541 | 88   | 626887 | 627153 | - | hypothetical protein MIMI_gp0466 [Acanthamoeba polyphaga mimivirus]                                                  | 176  | 100% | 1,00E-55  | 100.00% |
| 542 | 407  | 627176 | 628399 | - | hypothetical protein MIMI_gp0465 [Acanthamoeba polyphaga mimivirus]                                                  | 837  | 100% | 0.0       | 100.00% |
| 543 | 159  | 628540 | 629019 | + | hypothetical protein MIMI_gp0464 [Acanthamoeba polyphaga mimivirus]                                                  | 321  | 100% | 1,00E-110 | 100.00% |
| 544 | 76   | 629109 | 629339 | - | hypothetical protein [Acanthamoeba polyphaga mimivirus]                                                              | 155  | 100% | 2,00E-47  | 100.00% |
| 545 | 57   | 629317 | 629490 | - | hypothetical protein [Acanthamoeba polyphaga mimivirus]                                                              | 114  | 100% | 9,00E-32  | 100.00% |
| 546 | 192  | 629624 | 630202 | + | putative HD phosphohydrolase [Acanthamoeba castellanii mamavirus]                                                    | 393  | 100% | 2,00E-137 | 100.00% |
| 547 | 399  | 630189 | 631388 | - | 3'-5' exonuclease [Acanthamoeba castellanii mamavirus]                                                               | 800  | 100% | 0.0       | 100.00% |
| 548 | 256  | 631468 | 632238 | - | powxv late transcription factor VLTf3-like protein [Acanthamoeba castellanii mamavirus]                              | 503  | 100% | 2,00E-179 | 100.00% |
| 549 | 431  | 632298 | 633593 | - | putative transcription factor [Acanthamoeba polyphaga mimivirus]                                                     | 883  | 100% | 0.0       | 100.00% |
| 550 | 194  | 633702 | 634286 | - | hypothetical protein [Acanthamoeba castellanii mamavirus]                                                            | 397  | 100% | 1,00E-139 | 100.00% |
| 551 | 120  | 634349 | 634711 | - | hypothetical protein [Acanthamoeba castellanii mamavirus]                                                            | 241  | 100% | 3,00E-80  | 100.00% |
| 552 | 581  | 635646 | 637391 | + | capsid protein D13L [Hirudovirus strain Sangsue]                                                                     | 1215 | 100% | 0.0       | 100.00% |
| 553 | 342  | 637509 | 638537 | - | hypothetical protein MIMI_gp0454 [Acanthamoeba polyphaga mimivirus]                                                  | 690  | 100% | 0.0       | 100.00% |
| 554 | 530  | 638624 | 640216 | - | Zn finger-containing protein [Acanthamoeba castellanii mamavirus]                                                    | 1077 | 100% | 0.0       | 100.00% |
| 555 | 232  | 640374 | 641072 | - | hypothetical protein [Acanthamoeba castellanii mamavirus]                                                            | 471  | 100% | 1,00E-167 | 100.00% |
| 556 | 209  | 641257 | 641886 | + | hypothetical protein MIMI_gp0451 [Acanthamoeba polyphaga mimivirus]                                                  | 426  | 100% | 2,00E-150 | 100.00% |
| 557 | 244  | 641883 | 642617 | - | hypothetical protein [Acanthamoeba castellanii mamavirus]                                                            | 490  | 100% | 1,00E-174 | 100.00% |
| 558 | 342  | 642670 | 643698 | - | uncharacterized short-chain type dehydrogenase/reductase [Acanthamoeba polyphaga mimivirus]                          | 700  | 100% | 0.0       | 100.00% |
| 559 | 137  | 643940 | 644353 | - | nucleoside diphosphate kinase [Acanthamoeba polyphaga mimivirus]                                                     | 285  | 100% | 4,00E-97  | 100.00% |
| 560 | 491  | 644475 | 645950 | + | hypothetical protein MIMI_gp0447 [Acanthamoeba polyphaga mimivirus]                                                  | 1011 | 100% | 0.0       | 100.00% |
| 561 | 105  | 646023 | 646340 | + | hypothetical protein MIMI_gp0446 [Acanthamoeba polyphaga mimivirus]                                                  | 206  | 100% | 8,00E-67  | 100.00% |

|     |      |        |        |   |                                                                                                   |      |      |           |         |
|-----|------|--------|--------|---|---------------------------------------------------------------------------------------------------|------|------|-----------|---------|
| 562 | 415  | 646387 | 647634 | + | FNIP repeat-containing protein [Acanthamoeba castellanii mamavirus]                               | 830  | 100% | 0.0       | 100.00% |
| 563 | 73   | 647699 | 647920 | + | putative F-box and FNIP repeat-containing protein [Hirudovirus strain Sangsue]                    | 140  | 100% | 6,00E-42  | 93.15%  |
| 564 | 355  | 647930 | 648997 | - | hypothetical protein [Acanthamoeba castellanii mamavirus]                                         | 719  | 100% | 0.0       | 100.00% |
| 565 | 284  | 649097 | 649951 | + | hypothetical protein [Acanthamoeba castellanii mamavirus]                                         | 575  | 100% | 0.0       | 100.00% |
| 566 | 533  | 650028 | 651629 | - | replication factor C large subunit [Acanthamoeba castellanii mamavirus]                           | 1071 | 100% | 0.0       | 100.00% |
| 567 | 661  | 651899 | 653884 | + | putative core protein [Acanthamoeba polyphaga mimivirus]                                          | 1360 | 100% | 0.0       | 100.00% |
| 568 | 177  | 653972 | 654505 | - | hypothetical protein [Acanthamoeba castellanii mamavirus]                                         | 350  | 100% | 2,00E-121 | 100.00% |
| 569 | 223  | 654584 | 655255 | - | putative papain-like cysteine peptidase [Acanthamoeba castellanii mamavirus]                      | 451  | 100% | 4,00E-160 | 100.00% |
| 570 | 356  | 655373 | 656443 | - | putative RNA methyltransferase [Acanthamoeba polyphaga mimivirus]                                 | 725  | 100% | 0.0       | 100.00% |
| 571 | 191  | 656512 | 657087 | - | Alkylated DNA repair protein [Acanthamoeba castellanii mamavirus]                                 | 401  | 100% | 3,00E-141 | 100.00% |
| 572 | 389  | 657153 | 658322 | - | FtsI-like methyltransferase family protein [Acanthamoeba castellanii mamavirus]                   | 790  | 100% | 0.0       | 100.00% |
| 573 | 263  | 658396 | 659187 | + | Esterase lipase superfamily protein [Acanthamoeba castellanii mamavirus]                          | 531  | 100% | 0.0       | 100.00% |
| 574 | 754  | 659275 | 661539 | - | hypothetical protein MIMI_gp0433 [Acanthamoeba polyphaga mimivirus]                               | 1551 | 100% | 0.0       | 100.00% |
| 575 | 798  | 661536 | 663932 | - | Low complexity hypothetical protein [Acanthamoeba castellanii mamavirus]                          | 1602 | 100% | 0.0       | 100.00% |
| 576 | 226  | 664048 | 664728 | - | hypothetical protein MIMI_gp0431 [Acanthamoeba polyphaga mimivirus]                               | 449  | 100% | 4,00E-159 | 100.00% |
| 577 | 466  | 664769 | 666169 | - | putative serine/threonine-protein kinase [Acanthamoeba polyphaga mimivirus]                       | 958  | 100% | 0.0       | 100.00% |
| 578 | 352  | 666397 | 667455 | - | hypothetical protein [Acanthamoeba castellanii mamavirus]                                         | 686  | 100% | 0.0       | 100.00% |
| 579 | 362  | 667535 | 668623 | - | hypothetical protein MIMI_R398 [Acanthamoeba polyphaga mimivirus]                                 | 748  | 100% | 0.0       | 100.00% |
| 580 | 589  | 668827 | 670596 | + | hypothetical protein [Acanthamoeba castellanii mamavirus]                                         | 1216 | 100% | 0.0       | 100.00% |
| 581 | 519  | 670739 | 672298 | + | DNA or RNA helicase of superfamily II [Acanthamoeba castellanii mamavirus]                        | 1049 | 100% | 0.0       | 100.00% |
| 582 | 319  | 672370 | 673329 | - | replication factor C small subunit [Acanthamoeba castellanii mamavirus]                           | 640  | 100% | 0.0       | 100.00% |
| 583 | 448  | 673472 | 674818 | + | putative HD domain-containing protein [Acanthamoeba polyphaga mimivirus]                          | 922  | 100% | 0.0       | 100.00% |
| 584 | 634  | 674935 | 676839 | + | HSP70 [Acanthamoeba castellanii mamavirus]                                                        | 1308 | 100% | 0.0       | 100.00% |
| 585 | 617  | 676890 | 678743 | - | hypothetical protein [Acanthamoeba castellanii mamavirus]                                         | 1216 | 100% | 0.0       | 100.00% |
| 586 | 763  | 678760 | 681051 | - | hypothetical protein [Acanthamoeba castellanii mamavirus]                                         | 1504 | 100% | 0.0       | 100.00% |
| 587 | 1083 | 681092 | 684343 | + | hypothetical protein [Acanthamoeba castellanii mamavirus]                                         | 2191 | 100% | 0.0       | 100.00% |
| 588 | 268  | 684469 | 685275 | + | Endonuclease/exonuclease/phosphatase family protein [Acanthamoeba castellanii mamavirus]          | 541  | 100% | 0.0       | 100.00% |
| 589 | 265  | 685342 | 686139 | - | hypothetical protein [Acanthamoeba castellanii mamavirus]                                         | 519  | 100% | 0.0       | 100.00% |
| 590 | 473  | 686389 | 687810 | + | putative endonuclease of the XPG family [Acanthamoeba castellanii mamavirus]                      | 952  | 100% | 0.0       | 100.00% |
| 591 | 141  | 687880 | 688305 | + | hypothetical protein MIMI_gp0416 [Acanthamoeba polyphaga mimivirus]                               | 283  | 100% | 6,00E-96  | 100.00% |
| 592 | 132  | 688370 | 688768 | + | hypothetical protein MIMI_gp0415 [Acanthamoeba polyphaga mimivirus]                               | 265  | 100% | 3,00E-89  | 100.00% |
| 593 | 348  | 688785 | 689831 | - | divergent methyltransferase [Acanthamoeba castellanii mamavirus]                                  | 694  | 100% | 0.0       | 100.00% |
| 594 | 1170 | 689917 | 693429 | - | probable mRNA-capping enzyme [Acanthamoeba polyphaga mimivirus]                                   | 2353 | 100% | 0.0       | 100.00% |
| 595 | 283  | 693636 | 694487 | + | hypothetical protein [Acanthamoeba castellanii mamavirus]                                         | 570  | 100% | 0.0       | 100.00% |
| 596 | 421  | 694484 | 695749 | - | hypothetical protein [Acanthamoeba castellanii mamavirus]                                         | 835  | 100% | 0.0       | 100.00% |
| 597 | 304  | 695817 | 696731 | - | hypothetical protein MIMI_gp0410 [Acanthamoeba polyphaga mimivirus]                               | 619  | 100% | 0.0       | 100.00% |
| 598 | 195  | 696829 | 697416 | - | hypothetical protein MIMI_gp0409 [Acanthamoeba polyphaga mimivirus]                               | 376  | 100% | 4,00E-131 | 100.00% |
| 599 | 1144 | 697634 | 701068 | + | putative NTPase [Acanthamoeba polyphaga mimivirus]                                                | 2332 | 100% | 0.0       | 100.00% |
| 600 | 199  | 701129 | 701728 | + | putative DNA-directed RNA polymerase subunit [Acanthamoeba polyphaga mimivirus]                   | 394  | 100% | 6,00E-138 | 100.00% |
| 601 | 360  | 701874 | 702956 | + | putative diphosphoinositol polyphosphate phosphohydrolase [Acanthamoeba polyphaga mimivirus]      | 731  | 100% | 0.0       | 100.00% |
| 602 | 225  | 702993 | 703670 | + | putative N-acetylglucosaminyl phosphatidylinositol deacetylase [Acanthamoeba polyphaga mimivirus] | 458  | 100% | 1,00E-162 | 100.00% |
| 603 | 251  | 703688 | 704443 | + | putative glycosyltransferase [Acanthamoeba polyphaga mimivirus]                                   | 513  | 100% | 0.0       | 99.60%  |
| 604 | 250  | 704411 | 705163 | - | hypothetical protein MIMI_gp0404 [Acanthamoeba polyphaga mimivirus]                               | 508  | 100% | 0.0       | 100.00% |
| 605 | 761  | 705249 | 707534 | + | ankyrin repeat-containing protein [Acanthamoeba castellanii mamavirus]                            | 1524 | 100% | 0.0       | 100.00% |
| 606 | 144  | 707603 | 708037 | - | hypothetical protein MIMI_gp0401 [Acanthamoeba polyphaga mimivirus]                               | 288  | 100% | 5,00E-98  | 100.00% |
| 607 | 445  | 708134 | 709471 | - | hypothetical protein MIMI_gp0400 [Acanthamoeba polyphaga mimivirus]                               | 893  | 100% | 0.0       | 100.00% |
| 608 | 143  | 709551 | 709982 | - | probable FAD-linked sulfhydryl oxidase [Acanthamoeba polyphaga mimivirus]                         | 293  | 100% | 4,00E-100 | 100.00% |
| 609 | 483  | 710061 | 711512 | - | hypothetical protein MIMI_gp0398 [Acanthamoeba polyphaga mimivirus]                               | 969  | 100% | 0.0       | 100.00% |
| 610 | 1766 | 711590 | 716890 | - | putative ATP-dependent RNA helicase [Acanthamoeba polyphaga mimivirus]                            | 3584 | 100% | 0.0       | 100.00% |
| 611 | 393  | 716981 | 718162 | - | hypothetical protein lvs_R301 [Acanthamoeba polyphaga lentilivirius]                              | 774  | 100% | 0.0       | 100.00% |
| 612 | 532  | 718315 | 719913 | + | DEAD/SNF2 helicase [Acanthamoeba castellanii mamavirus]                                           | 1099 | 100% | 0.0       | 100.00% |
| 613 | 256  | 719975 | 720745 | - | putative glycosyltransferase [Acanthamoeba castellanii mamavirus]                                 | 528  | 100% | 0.0       | 100.00% |
| 614 | 346  | 720822 | 721862 | - | Thioredoxin [Acanthamoeba castellanii mamavirus]                                                  | 716  | 100% | 0.0       | 100.00% |
| 615 | 262  | 721989 | 722777 | + | hypothetical protein MIMI_gp0391 [Acanthamoeba polyphaga mimivirus]                               | 536  | 100% | 0.0       | 100.00% |
| 616 | 177  | 722795 | 723328 | + | hypothetical protein [Acanthamoeba castellanii mamavirus]                                         | 351  | 100% | 8,00E-122 | 100.00% |
| 617 | 1107 | 723410 | 726733 | + | putative DNA mismatch repair protein MutS-like protein [Acanthamoeba polyphaga mimivirus]         | 2256 | 100% | 0.0       | 100.00% |
| 618 | 272  | 726773 | 727591 | - | hypothetical protein [Acanthamoeba polyphaga mimivirus]                                           | 549  | 100% | 0.0       | 100.00% |
| 619 | 73   | 727679 | 727900 | - | putative DNA-directed RNA polymerase II subunit N [Acanthamoeba polyphaga mimivirus]              | 151  | 100% | 3,00E-46  | 100.00% |
| 620 | 496  | 728045 | 729535 | + | Low complexity hypothetical protein [Acanthamoeba castellanii mamavirus]                          | 993  | 100% | 0.0       | 100.00% |
| 621 | 617  | 729635 | 731488 | + | hypothetical protein HIRU_S602 [Hirudovirus strain Sangsue]                                       | 1188 | 100% | 0.0       | 98.71%  |
| 622 | 302  | 731472 | 732380 | - | putative thiol protease [Acanthamoeba castellanii mamavirus]                                      | 627  | 100% | 0.0       | 100.00% |
| 623 | 549  | 732487 | 734136 | - | YqaJ viral recombinase family [Acanthamoeba castellanii mamavirus]                                | 1120 | 100% | 0.0       | 100.00% |
| 624 | 178  | 734255 | 734791 | - | hypothetical protein MIMI_gp0382 [Acanthamoeba polyphaga mimivirus]                               | 354  | 100% | 4,00E-123 | 100.00% |
| 625 | 292  | 734920 | 735798 | + | hypothetical protein MIMI_gp0381 [Acanthamoeba polyphaga mimivirus]                               | 593  | 100% | 0.0       | 100.00% |
| 626 | 382  | 735839 | 736987 | - | hypothetical protein [Acanthamoeba castellanii mamavirus]                                         | 784  | 100% | 0.0       | 100.00% |
| 627 | 817  | 737069 | 739522 | - | SNF2 family helicase [Acanthamoeba castellanii mamavirus]                                         | 1686 | 100% | 0.0       | 100.00% |
| 628 | 968  | 739639 | 742545 | - | hypothetical protein lvs_R284 [Acanthamoeba polyphaga lentilivirius]                              | 1968 | 100% | 0.0       | 100.00% |
| 629 | 705  | 742597 | 744714 | - | hypothetical protein MIMI_gp0377 [Acanthamoeba polyphaga mimivirus]                               | 1408 | 100% | 0.0       | 100.00% |
| 630 | 485  | 744815 | 746272 | - | hypothetical protein MIMI_gp0376 [Acanthamoeba polyphaga mimivirus]                               | 1002 | 100% | 0.0       | 100.00% |
| 631 | 195  | 746363 | 746950 | - | hypothetical protein MIMI_gp0375 [Acanthamoeba polyphaga mimivirus]                               | 386  | 100% | 4,00E-135 | 100.00% |
| 632 | 973  | 747175 | 750096 | - | putative regulator of chromosome condensation [Acanthamoeba polyphaga mimivirus]                  | 1990 | 100% | 0.0       | 100.00% |
| 633 | 83   | 750503 | 750754 | - | hypothetical protein MIMI_gp0373 [Acanthamoeba polyphaga mimivirus]                               | 165  | 100% | 2,00E-51  | 100.00% |
| 634 | 526  | 750869 | 752449 | + | WD-repeat family protein [Acanthamoeba castellanii mamavirus]                                     | 1060 | 100% | 0.0       | 100.00% |
| 635 | 538  | 752493 | 754109 | - | probable ribonuclease 3 [Acanthamoeba polyphaga mimivirus]                                        | 1090 | 100% | 0.0       | 100.00% |
| 636 | 255  | 754206 | 754973 | - | hypothetical protein lvs_R277 [Acanthamoeba polyphaga lentilivirius]                              | 519  | 100% | 0.0       | 100.00% |
| 637 | 584  | 755054 | 756808 | - | powirus poly(A) polymerase catalytic subunit-like protein [Acanthamoeba castellanii mamavirus]    | 1196 | 100% | 0.0       | 100.00% |
| 638 | 324  | 756982 | 757956 | + | hypothetical protein [Acanthamoeba castellanii mamavirus]                                         | 657  | 100% | 0.0       | 100.00% |
| 639 | 173  | 757962 | 758483 | - | transcription factor S-II-related protein [Acanthamoeba polyphaga mimivirus]                      | 353  | 100% | 6,00E-123 | 100.00% |
| 640 | 895  | 758581 | 761268 | - | hypothetical protein [Acanthamoeba castellanii mamavirus]                                         | 1818 | 100% | 0.0       | 100.00% |
| 641 | 607  | 761541 | 763364 | - | hypothetical protein lvs_R273 [Acanthamoeba polyphaga lentilivirius]                              | 1205 | 100% | 0.0       | 100.00% |
| 642 | 341  | 763458 | 764483 | - | hypothetical protein [Acanthamoeba castellanii mamavirus]                                         | 639  | 100% | 0.0       | 100.00% |
| 643 | 187  | 764647 | 765210 | + | hypothetical protein MIMI_gp0363 [Acanthamoeba polyphaga mimivirus]                               | 363  | 100% | 2,00E-126 | 100.00% |
| 644 | 203  | 765289 | 765900 | + | hypothetical protein [Acanthamoeba castellanii mamavirus]                                         | 397  | 100% | 6,00E-139 | 100.00% |
| 645 | 208  | 765989 | 766615 | + | hypothetical protein [Acanthamoeba castellanii mamavirus]                                         | 411  | 100% | 1,00E-144 | 100.00% |
| 646 | 374  | 766652 | 767776 | - | hypothetical protein [Acanthamoeba castellanii mamavirus]                                         | 770  | 100% | 0.0       | 100.00% |
| 647 | 265  | 767963 | 768760 | + | hypothetical protein [Acanthamoeba castellanii mamavirus]                                         | 531  | 100% | 0.0       | 100.00% |
| 648 | 184  | 768856 | 769410 | - | hypothetical protein [Acanthamoeba castellanii mamavirus]                                         | 366  | 100% | 1,00E-127 | 100.00% |
| 649 | 85   | 769421 | 769678 | - | hypothetical protein MIMI_gp0357 [Acanthamoeba polyphaga mimivirus]                               | 175  | 100% | 4,00E-55  | 100.00% |
| 650 | 361  | 769730 | 770815 | - | hypothetical protein [Acanthamoeba castellanii mamavirus]                                         | 707  | 100% | 0.0       | 100.00% |
| 651 | 2064 | 771062 | 777256 | - | powirus early transcription factor-like protein [Acanthamoeba castellanii mamavirus]              | 4184 | 100% | 0.0       | 100.00% |
| 652 | 197  | 777374 | 777967 | - | putative metallopeptidase WLM [Acanthamoeba castellanii mamavirus]                                | 395  | 100% | 9,00E-139 | 100.00% |
| 653 | 348  | 778116 | 779162 | - | hypothetical protein [Acanthamoeba castellanii mamavirus]                                         | 712  | 100% | 0.0       | 100.00% |
| 654 | 283  | 779200 | 780051 | + | Myristylated IMV envelope protein [Acanthamoeba castellanii mamavirus]                            | 558  | 100% | 0.0       | 100.00% |
| 655 | 56   | 780100 | 780270 | + | orphan [Mimivirus reunion]                                                                        | 105  | 100% | 2,00E-28  | 94.64%  |

|     |      |        |        |   |                                                                                                   |      |      |           |            |
|-----|------|--------|--------|---|---------------------------------------------------------------------------------------------------|------|------|-----------|------------|
| 656 | 1740 | 780364 | 785586 | - | DNA polymerase [Acanthamoeba polyphaga mimivirus]                                                 | 3563 | 100% | 0.0       | 100.00%    |
| 657 | 184  | 785692 | 786246 | - | hypothetical protein [Acanthamoeba castellanii mamavirus]                                         | 368  | 100% | 3,00E-128 | 100.00%    |
| 658 | 253  | 786375 | 787136 | + | putative methyltransferase [Acanthamoeba polyphaga mimivirus]                                     | 518  | 100% | 0.0       | 100.00%    |
| 659 | 468  | 787207 | 788613 | - | putative ubiquitin-specific protease [Acanthamoeba castellanii mamavirus]                         | 979  | 100% | 0.0       | 100.00%    |
| 660 | 354  | 788751 | 789815 | + | probable DNA polymerase family X [Acanthamoeba polyphaga mimivirus]                               | 717  | 100% | 0.0       | 100.00%    |
| 661 | 230  | 789881 | 790573 | - | hypothetical protein [Acanthamoeba castellanii mamavirus]                                         | 467  | 100% | 4,00E-166 | 100.00%    |
| 662 | 148  | 790786 | 791232 | + | probable glucosamine 6-phosphate N-acetyltransferase [Acanthamoeba polyphaga mimivirus]           | 301  | 100% | 3,00E-103 | 100.00%    |
| 663 | 287  | 791261 | 792124 | + | Formamidopyrimidine-DNA glycosylase [Acanthamoeba castellanii mamavirus]                          | 583  | 100% | 0.0       | 100.00%    |
| 664 | 138  | 792209 | 792625 | - | hypothetical protein [Acanthamoeba castellanii mamavirus]                                         | 286  | 100% | 1,00E-97  | 100.00%    |
| 665 | 881  | 792755 | 795400 | - | ribonucleoside-diphosphate reductase large subunit [Acanthamoeba polyphaga mimivirus]             | 1825 | 100% | 0.0       | 100.00%    |
| 666 | 417  | 795555 | 796808 | + | ribonucleotide reductase small subunit [Acanthamoeba castellanii mamavirus]                       | 850  | 100% | 0.0       | 100.00%    |
| 667 | 659  | 796898 | 798877 | - | RING domain-containing protein [Acanthamoeba castellanii mamavirus]                               | 1296 | 100% | 0.0       | 100.00%    |
| 668 | 164  | 799011 | 799505 | + | hypothetical protein MIMI_gp0339 [Acanthamoeba polyphaga mimivirus]                               | 330  | 100% | 5,00E-114 | 100.00%    |
| 669 | 95   | 799568 | 799855 | + | hypothetical protein MIMI_gp0338 [Acanthamoeba polyphaga mimivirus]                               | 192  | 100% | 1,00E-61  | 100.00%    |
| 670 | 71   | 799884 | 800099 | + | hypothetical protein MIMI_gp0337 [Acanthamoeba polyphaga mimivirus]                               | 149  | 100% | 4,00E-45  | 100.00%    |
| 671 | 325  | 800243 | 801220 | + | hypothetical protein [Acanthamoeba polyphaga mimivirus]                                           | 660  | 100% | 0.0       | 100.00%    |
| 672 | 322  | 801290 | 802258 | + | putative mRNA capping enzyme [Acanthamoeba polyphaga mimivirus]                                   | 649  | 100% | 0.0       | 100.00%    |
| 673 | 292  | 802374 | 803252 | - | putative protein phosphatase 2C [Acanthamoeba polyphaga mimivirus]                                | 607  | 100% | 0.0       | 100.00%    |
| 674 | 169  | 803412 | 803921 | - | hypothetical protein [Acanthamoeba castellanii mamavirus]                                         | 339  | 100% | 2,00E-117 | 100.00%    |
| 675 | 273  | 803996 | 804817 | - | hypothetical protein [Acanthamoeba castellanii mamavirus]                                         | 545  | 100% | 0.0       | 100.00%    |
| 676 | 698  | 804888 | 806798 | - | NAD-dependent DNA ligase [Acanthamoeba castellanii mamavirus]                                     | 1277 | 100% | 0.0       | 100.00%    |
| 677 | 114  | 806870 | 807214 | - | hypothetical protein [Acanthamoeba polyphaga mimivirus]                                           | 226  | 100% | 2,00E-74  | 100.00%    |
| 678 | 397  | 807385 | 808578 | - | putative serine/threonine-protein kinase [Acanthamoeba polyphaga mimivirus]                       | 797  | 100% | 0.0       | 100.00%    |
| 679 | 166  | 808612 | 809112 | + | uncharacterized endo/exonuclease amino terminal domain protein [Acanthamoeba polyphaga mimivirus] | 338  | 100% | 3,00E-117 | 100.00%    |
| 680 | 70   | 809207 | 809419 | + | hypothetical protein MIMI_gp0327 [Acanthamoeba polyphaga mimivirus]                               | 136  | 100% | 2,00E-40  | 100.00%    |
| 681 | 306  | 809494 | 810414 | - | probable ribonuclease H protein [Acanthamoeba polyphaga mimivirus]                                | 623  | 100% | 0.0       | 100.00%    |
| 682 | 284  | 810475 | 811329 | - | hypothetical protein [Acanthamoeba castellanii mamavirus]                                         | 574  | 100% | 0.0       | 100.00%    |
| 683 | 295  | 811396 | 812283 | - | apurinic endonuclease IV [Acanthamoeba castellanii mamavirus]                                     | 612  | 100% | 0.0       | 100.00%    |
| 684 | 189  | 812282 | 812851 | + | hypothetical protein [Acanthamoeba polyphaga mimivirus]                                           | 370  | 100% | 4,00E-129 | 99.47%     |
| 685 | 2959 | 812901 | 821780 | + | hypothetical protein [Acanthamoeba castellanii mamavirus]                                         | 5943 | 100% | 0.0       | 100.00%    |
| 686 | 452  | 821771 | 823129 | + | peptidase C19 subfamily protein [Acanthamoeba castellanii mamavirus]                              | 908  | 100% | 0.0       | 100.00%    |
| 687 | 191  | 823184 | 823759 | - | hypothetical protein MIMI_gp0320 [Acanthamoeba polyphaga mimivirus]                               | 377  | 100% | 7,00E-132 | 100.00%    |
| 688 | 581  | 823949 | 825694 | + | putative low complexity protein [Acanthamoeba castellanii mamavirus]                              | 1134 | 100% | 0.0       | 99.66%     |
| 689 | 548  | 825822 | 827468 | - | DEAD/SNF2-like helicase [Acanthamoeba castellanii mamavirus]                                      | 1128 | 100% | 0.0       | 100.00%    |
| 690 | 559  | 827594 | 829273 | + | ankyrin containing protein [Acanthamoeba polyphaga lentillevirus]                                 | 1135 | 100% | 0.0       | 100.00%    |
| 691 | 210  | 829431 | 830063 | + | Ricin-type lectin protein [Acanthamoeba castellanii mamavirus]                                    | 425  | 100% | 5,00E-150 | 100.00%    |
| 692 | 242  | 830135 | 830863 | - | hypothetical protein [Acanthamoeba castellanii mamavirus]                                         | 487  | 100% | 2,00E-173 | 100.00%    |
| 693 | 250  | 830962 | 831714 | - | hypothetical protein [Acanthamoeba castellanii mamavirus]                                         | 503  | 100% | 1,00E-179 | 100.00%    |
| 694 | 205  | 831937 | 832554 | + | hypothetical protein lvs_L234 [Acanthamoeba polyphaga lentillevirus]                              | 434  | 100% | 1,00E-153 | 100.00%    |
| 695 | 356  | 832691 | 833761 | + | hypothetical protein [Acanthamoeba castellanii mamavirus]                                         | 729  | 100% | 0.0       | 100.00%    |
| 696 | 553  | 833848 | 835509 | + | hypothetical protein [Acanthamoeba castellanii mamavirus]                                         | 1145 | 100% | 0.0       | 100.00%    |
| 697 | 152  | 835621 | 836079 | + | hypothetical protein [Acanthamoeba castellanii mamavirus]                                         | 313  | 100% | 2,00E-107 | 100.00%    |
| 698 | 292  | 836167 | 837045 | + | hypothetical protein [Acanthamoeba castellanii mamavirus]                                         | 587  | 100% | 0.0       | 100.00%    |
| 699 | 197  | 837138 | 837731 | + | putative acetyltransferase [Acanthamoeba castellanii mamavirus]                                   | 402  | 100% | 4,00E-141 | 100.00%    |
| 700 | 470  | 838125 | 839537 | + | ankyrin repeat-containing protein [Acanthamoeba castellanii mamavirus]                            | 960  | 100% | 0.0       | 100.00%    |
| 701 | 126  | 839634 | 840014 | + | hypothetical protein [Acanthamoeba castellanii mamavirus]                                         | 261  | 100% | 8,00E-88  | 100.00%    |
| 702 | 138  | 840027 | 840443 | - | hypothetical protein [Acanthamoeba castellanii mamavirus]                                         | 280  | 100% | 3,00E-95  | 100.00%    |
| 703 | 237  | 840530 | 841243 | + | putative oxoglutarate/malate carrier protein [Acanthamoeba castellanii mamavirus]                 | 482  | 100% | 6,00E-172 | 100.00%    |
| 704 | 79   | 841700 | 841939 | + | hypothetical protein [Acanthamoeba castellanii mamavirus]                                         | 161  | 100% | 5,00E-50  | 100.00%    |
| 705 | 435  | 842047 | 843354 | - | divergent BTB domain-protein [Acanthamoeba castellanii mamavirus]                                 | 877  | 100% | 0.0       | 100.00%    |
| 706 | 64   | 843381 | 843575 | - | hypothetical protein [Acanthamoeba castellanii mamavirus]                                         | 133  | 100% | 4,00E-39  | 100.00%    |
| 707 | 212  | 843808 | 844446 | + | hypothetical protein MIMI_gp0299 [Acanthamoeba polyphaga mimivirus]                               | 446  | 100% | 4,00E-158 | 100.00%    |
| 708 | 446  | 844662 | 846002 | + | hypothetical protein [Acanthamoeba castellanii mamavirus]                                         | 900  | 100% | 0.0       | 100.00%    |
| 709 | 771  | 846095 | 848410 | + | hypothetical protein [Acanthamoeba castellanii mamavirus]                                         | 1513 | 100% | 0.0       | 100.00%    |
| 710 | 86   | 848441 | 848701 | + | hypothetical protein [Acanthamoeba castellanii mamavirus]                                         | 172  | 100% | 7,00E-54  | 100.00%    |
| 711 | 725  | 848823 | 851000 | + | ankyrin repeat-containing protein [Acanthamoeba castellanii mamavirus]                            | 172  | 100% | 7,00E-54  | 100.00%    |
| 712 | 112  | 851178 | 851516 | + | hypothetical protein lvs_L221 [Acanthamoeba polyphaga lentillevirus]                              | 232  | 100% | 7,00E-77  | 100.00%    |
| 713 | 264  | 851616 | 852410 | + | hypothetical protein [Acanthamoeba castellanii mamavirus]                                         | 525  | 100% | 0.0       | 100.00%    |
| 714 | 546  | 852543 | 854183 | + | serine-threonine kinase [Acanthamoeba castellanii mamavirus]                                      | 1107 | 100% | 0.0       | 100.00%    |
| 715 | 433  | 854242 | 855543 | - | ankyrin repeat-containing protein [Acanthamoeba castellanii mamavirus]                            | 874  | 100% | 0.0       | 100.00%    |
| 716 | 181  | 855626 | 856171 | - | DnaJ-like protein [Acanthamoeba castellanii mamavirus]                                            | 356  | 100% | 8,00E-124 | 100.00%    |
| 717 | 63   | 856375 | 856566 | - | No significant similarity found                                                                   | -    | -    | -         | -          |
| 718 | 232  | 856566 | 857264 | + | hypothetical protein [Samba virus]                                                                | 458  | 100% | 4,00E-161 | 100.00%    |
| 719 | 1396 | 857370 | 861560 | + | putative WD repeat-containing protein [Hirudovirus strain Sangsue]                                | 2817 | 100% | 0.0       | 98.87%     |
| 720 | 583  | 861609 | 863360 | + | hypothetical protein [Acanthamoeba castellanii mamavirus]                                         | 1178 | 100% | 0.0       | 100.00%    |
| 721 | 216  | 863421 | 864071 | + | hypothetical protein MIMI_gp0286 [Acanthamoeba polyphaga mimivirus]                               | 436  | 100% | 2,00E-154 | 100.00%    |
| 722 | 181  | 864080 | 864625 | - | hypothetical protein [Acanthamoeba castellanii mamavirus]                                         | 372  | 100% | 6,00E-130 | 100.00%    |
| 723 | 398  | 864719 | 865915 | - | DnaJ-like protein [Acanthamoeba castellanii mamavirus]                                            | 828  | 100% | 0.0       | 100.00%    |
| 724 | 292  | 866011 | 866889 | - | putative tRNA(His) guanylyltransferase [Acanthamoeba polyphaga mimivirus]                         | 602  | 100% | 0.0       | 100.00%    |
| 725 | 216  | 867130 | 867780 | + | thymidine kinase [Acanthamoeba polyphaga mimivirus]                                               | 435  | 100% | 9,00E-154 | 100.00%    |
| 726 | 335  | 867861 | 868868 | - | hypothetical protein MIMI_gp0281 [Acanthamoeba polyphaga mimivirus]                               | 684  | 100% | 0.0       | 100.00%    |
| 727 | 213  | 869061 | 869702 | + | hypothetical protein MIMI_gp0280 [Acanthamoeba polyphaga mimivirus]                               | 420  | 100% | 4,00E-148 | 100.00%    |
| 728 | 312  | 869770 | 870708 | - | hypothetical protein MIMI_gp0279 [Acanthamoeba polyphaga mimivirus]                               | 634  | 100% | 0.0       | 100.00%    |
| 729 | 941  | 870861 | 873686 | + | heat shock protein 70-like protein [Acanthamoeba polyphaga mimivirus]                             | 1915 | 100% | 0.0       | 100.00%    |
| 730 | 58   | 873766 | 873942 | - | hypothetical protein MIMI_gp0277 [Acanthamoeba polyphaga mimivirus]                               | 117  | 100% | 5,00E-33  | 100.00%    |
| 731 | 367  | 874010 | 875113 | - | hypothetical protein HIRU_5710 [Hirudovirus strain Sangsue]                                       | 739  | 100% | 0.0       | 99.73%     |
| 732 | 268  | 875141 | 875947 | - | hypothetical protein MIMI_gp0275 [Acanthamoeba polyphaga mimivirus]                               | 517  | 100% | 0.0       | 100.00%    |
| 733 | 1024 | 876232 | 879306 | + | Ion protease-like protein [Acanthamoeba polyphaga mimivirus]                                      | 2066 | 100% | 0.0       | 100.00%    |
| 734 | 80   | 879330 | 879572 | + | hypothetical protein MIMI_gp0273 [Acanthamoeba polyphaga mimivirus]                               | 165  | 100% | 2,00E-51  | 100.00%    |
| 735 | 461  | 879701 | 881086 | + | putative transcription initiation factor IIB-like protein [Acanthamoeba polyphaga mimivirus]      | 939  | 100% | 0.0       | 100.00%    |
| 736 | 370  | 881159 | 882271 | + | putative uracil-DNA glycosylase [Acanthamoeba castellanii mamavirus]                              | 760  | 100% | 0.0       | 100.00%    |
| 737 | 406  | 882371 | 883591 | + | hypothetical protein MIMI_gp0270 [Acanthamoeba polyphaga mimivirus]                               | 813  | 100% | 0.0       | 100.00%    |
| 738 | 524  | 883737 | 885311 | + | DNA directed RNA polymerase subunit 2 [Acanthamoeba castellanii mamavirus]                        | 1085 | 100% | 0.0       | 100.00%    |
| 739 | 394  | 885460 | 886644 | + | HNH endonuclease [Acanthamoeba castellanii mamavirus]                                             | 801  | 100% | 0.0       | 100.00%    |
| 740 | 640  | 887053 | 888975 | + | DNA directed RNA polymerase subunit 2 [Acanthamoeba castellanii mamavirus]                        | 1336 | 100% | 0.0       | 100.00%    |
| 741 | 330  | 888975 | 889967 | + | uncharacterized HNH endonuclease [Acanthamoeba polyphaga mimivirus]                               | 666  | 100% | 0.0       | 100.00%    |
| 742 | 109  | 890251 | 890580 | + | DNA-directed RNA polymerase subunit 2 [Hirudovirus strain Sangsue]                                | 228  | 100% | 2,00E-75  | 100.00%    |
| 743 | 168  | 890639 | 891145 | + | hypothetical protein [Acanthamoeba castellanii mamavirus]                                         | 346  | 100% | 3,00E-120 | 100.00%    |
| 744 | 163  | 891215 | 891706 | + | hypothetical protein [Acanthamoeba castellanii mamavirus]                                         | 331  | 100% | 3,00E-114 | 100.00%    |
| 745 | 65   | 891749 | 891946 | + | orphan [Mimivirus reunion]                                                                        | 48.5 | 66%  | 1,00E-05  | 56.90%     |
| 746 | 812  | 891934 | 894372 | - | collagen triple helix repeat containing protein [Acanthamoeba polyphaga lentillevirus]            | 1412 | 100% | 0.0       | 100.00%    |
| 747 | 817  | 894450 | 896903 | - | Collagen triple helix repeat containing protein [Acanthamoeba castellanii mamavirus]              | 1469 | 100% | 0.0       | 100.00%    |
| 748 | 915  | 897035 | 899782 | - | Collagen triple helix repeat containing protein [Acanthamoeba castellanii mamavirus]              | 1631 | 1631 | 100%      | 0.0 99.03% |
| 749 | 441  | 899811 | 901136 | - | Collagen triple helix repeat containing protein [Acanthamoeba castellanii mamavirus]              | 866  | 100% | 0.0       | 100.00%    |



|     |      |         |         |   |                                                                                         |      |      |           |         |
|-----|------|---------|---------|---|-----------------------------------------------------------------------------------------|------|------|-----------|---------|
| 750 | 289  | 901304  | 902173  | + | hypothetical protein [Acanthamoeba castellanii mamavirus]                               | 566  | 100% | 0.0       | 100.00% |
| 751 | 148  | 902211  | 902657  | + | hypothetical protein [Acanthamoeba castellanii mamavirus]                               | 303  | 100% | 7,00E-104 | 100.00% |
| 752 | 205  | 902731  | 903348  | + | RNA polymerase subunit 5 [Acanthamoeba castellanii mamavirus]                           | 414  | 100% | 8,00E-146 | 100.00% |
| 753 | 288  | 903456  | 904322  | + | hypothetical protein [Acanthamoeba castellanii mamavirus]                               | 584  | 100% | 0.0       | 100.00% |
| 754 | 440  | 904407  | 905729  | + | putative Zn-dependent peptidase [Acanthamoeba castellanii mamavirus]                    | 893  | 100% | 0.0       | 100.00% |
| 755 | 633  | 905831  | 907732  | + | Serine/Threonine protein kinase [Acanthamoeba castellanii mamavirus]                    | 1266 | 100% | 0.0       | 100.00% |
| 756 | 191  | 907795  | 908370  | + | hypothetical protein [Acanthamoeba castellanii mamavirus]                               | 380  | 100% | 3,00E-133 | 100.00% |
| 757 | 895  | 908540  | 911227  | + | Procollagen-lysine,2-oxoglutarate 5-dioxygenase [Acanthamoeba castellanii mamavirus]    | 1857 | 100% | 0.0       | 100.00% |
| 758 | 290  | 911358  | 912230  | - | ankyrin repeat-containing protein [Acanthamoeba castellanii mamavirus]                  | 593  | 100% | 0.0       | 100.00% |
| 759 | 633  | 912374  | 914275  | + | hypothetical protein [Acanthamoeba castellanii mamavirus]                               | 1270 | 100% | 0.0       | 100.00% |
| 760 | 170  | 914405  | 914917  | + | hypothetical protein [Acanthamoeba castellanii mamavirus]                               | 344  | 100% | 3,00E-119 | 100.00% |
| 761 | 691  | 915007  | 917082  | + | ankyrin repeat-containing protein [Acanthamoeba castellanii mamavirus]                  | 1390 | 100% | 0.0       | 100.00% |
| 762 | 531  | 917154  | 918749  | - | N-terminal divergent BTB domain-containing protein [Acanthamoeba castellanii mamavirus] | 1066 | 100% | 0.0       | 100.00% |
| 763 | 540  | 918859  | 920481  | - | putative BTB/POZ domain-containing protein [Acanthamoeba polyphaga mimivirus]           | 1072 | 100% | 0.0       | 100.00% |
| 764 | 156  | 920619  | 921089  | + | hypothetical protein [Acanthamoeba castellanii mamavirus]                               | 317  | 100% | 3,00E-109 | 100.00% |
| 765 | 308  | 921158  | 922084  | + | Protein lysine methyltransferase [Acanthamoeba castellanii mamavirus]                   | 626  | 100% | 0.0       | 100.00% |
| 766 | 854  | 922182  | 924746  | + | Topoisomerase I [Acanthamoeba castellanii mamavirus]                                    | 1727 | 100% | 0.0       | 100.00% |
| 767 | 340  | 924850  | 925872  | - | hypothetical protein MIMI_gp0242 [Acanthamoeba polyphaga mimivirus]                     | 691  | 100% | 0.0       | 100.00% |
| 768 | 663  | 925921  | 927912  | - | putative ankyrin repeat protein [Acanthamoeba polyphaga mimivirus]                      | 1335 | 100% | 0.0       | 100.00% |
| 769 | 281  | 928008  | 928853  | + | hypothetical protein MIMI_gp0240 [Acanthamoeba polyphaga mimivirus]                     | 577  | 100% | 0.0       | 100.00% |
| 770 | 732  | 928912  | 931110  | - | hypothetical protein [Acanthamoeba castellanii mamavirus]                               | 1481 | 100% | 0.0       | 100.00% |
| 771 | 226  | 931292  | 931972  | + | putative ankyrin repeat protein [Acanthamoeba polyphaga mimivirus]                      | 449  | 100% | 2,00E-159 | 100.00% |
| 772 | 215  | 932021  | 932668  | - | Rab family GTPase [Acanthamoeba castellanii mamavirus]                                  | 436  | 100% | 2,00E-154 | 100.00% |
| 773 | 174  | 932841  | 933365  | - | hypothetical protein [Acanthamoeba castellanii mamavirus]                               | 352  | 100% | 2,00E-122 | 100.00% |
| 774 | 275  | 933445  | 934272  | - | hypothetical protein [Acanthamoeba castellanii mamavirus]                               | 551  | 100% | 0.0       | 99.64%  |
| 775 | 262  | 934371  | 935159  | + | hypothetical protein lvs_L164 [Acanthamoeba polyphaga lentillevirus]                    | 514  | 100% | 0.0       | 100.00% |
| 776 | 383  | 935134  | 936285  | - | hypothetical protein [Acanthamoeba castellanii mamavirus]                               | 766  | 100% | 0.0       | 100.00% |
| 777 | 387  | 936423  | 937586  | - | hypothetical protein [Acanthamoeba castellanii mamavirus]                               | 781  | 100% | 0.0       | 100.00% |
| 778 | 192  | 937730  | 938308  | + | hypothetical protein [Acanthamoeba castellanii mamavirus]                               | 394  | 100% | 2,00E-138 | 100.00% |
| 779 | 960  | 938441  | 941323  | + | primase/helicase [Acanthamoeba castellanii mamavirus]                                   | 1994 | 100% | 0.0       | 100.00% |
| 780 | 531  | 941570  | 943165  | + | Protein kinase family protein [Acanthamoeba castellanii mamavirus]                      | 1088 | 100% | 0.0       | 100.00% |
| 781 | 64   | 943418  | 943612  | - | hypothetical protein MIMI_gp0227 [Acanthamoeba polyphaga mimivirus]                     | 129  | 100% | 2,00E-37  | 100.00% |
| 782 | 441  | 943800  | 945125  | + | hypothetical protein [Acanthamoeba castellanii mamavirus]                               | 874  | 100% | 0.0       | 100.00% |
| 783 | 337  | 945202  | 946215  | - | hypothetical protein [Acanthamoeba castellanii mamavirus]                               | 687  | 100% | 0.0       | 100.00% |
| 784 | 151  | 946371  | 946826  | + | hypothetical protein MIMI_gp0224 [Acanthamoeba polyphaga mimivirus]                     | 308  | 100% | 6,00E-106 | 100.00% |
| 785 | 373  | 946835  | 947956  | + | hypothetical protein HIRU_S765 [Hirudovirus strain Sangsue]                             | 699  | 100% | 0.0       | 99.73%  |
| 786 | 158  | 948109  | 948585  | + | hypothetical protein [Acanthamoeba castellanii mamavirus]                               | 310  | 100% | 2,00E-106 | 100.00% |
| 787 | 234  | 948666  | 949370  | + | hypothetical protein [Acanthamoeba castellanii mamavirus]                               | 470  | 100% | 4,00E-167 | 100.00% |
| 788 | 115  | 949342  | 949689  | - | hypothetical protein [Acanthamoeba castellanii mamavirus]                               | 227  | 100% | 6,00E-75  | 100.00% |
| 789 | 187  | 949800  | 950363  | - | putative cytidine deaminase [Acanthamoeba castellanii mamavirus]                        | 377  | 100% | 7,00E-132 | 100.00% |
| 790 | 1360 | 950724  | 954806  | - | collagen triple helix repeat containing protein [Acanthamoeba polyphaga lentillevirus]  | 2402 | 100% | 0.0       | 100.00% |
| 791 | 77   | 955042  | 955275  | - | collagen triple helix repeat-containing protein [Acanthamoeba polyphaga mimivirus]      | 169  | 100% | 2,00E-46  | 100.00% |
| 792 | 564  | 955559  | 957253  | - | collagen triple helix repeat-containing protein [Acanthamoeba castellanii mamavirus]    | 2144 | 99%  | 0.0       | 99.82%  |
| 793 | 436  | 957475  | 958785  | - | Collagen triple helix repeat containing protein [Acanthamoeba castellanii mamavirus]    | 1384 | 85%  | 0.0       | 100.00% |
| 794 | 102  | 959102  | 959410  | - | probable glutaredoxin [Acanthamoeba polyphaga mimivirus]                                | 211  | 100% | 5,00E-69  | 100.00% |
| 795 | 336  | 959483  | 960493  | - | DNA topoisomerase 1b [Acanthamoeba polyphaga mimivirus]                                 | 688  | 100% | 0.0       | 100.00% |
| 796 | 601  | 960651  | 962456  | + | putative glycosyl-transferase [Acanthamoeba castellanii mamavirus]                      | 1247 | 100% | 0.0       | 100.00% |
| 797 | 255  | 962557  | 963324  | + | hypothetical protein [Acanthamoeba castellanii mamavirus]                               | 515  | 100% | 0.0       | 100.00% |
| 798 | 54   | 963383  | 963547  | - | hypothetical protein [Acanthamoeba castellanii mamavirus]                               | 110  | 100% | 2,00E-30  | 100.00% |
| 799 | 78   | 963566  | 963802  | - | hypothetical protein MIMI_gp0212 [Acanthamoeba polyphaga mimivirus]                     | 155  | 100% | 2,00E-47  | 100.00% |
| 800 | 276  | 964023  | 964853  | + | hypothetical protein [Acanthamoeba castellanii mamavirus]                               | 574  | 100% | 0.0       | 100.00% |
| 801 | 359  | 964924  | 966003  | - | ankyrin repeat-containing protein [Acanthamoeba castellanii mamavirus]                  | 716  | 100% | 0.0       | 100.00% |
| 802 | 120  | 966357  | 966719  | + | hypothetical protein MIMI_gp0209 [Acanthamoeba polyphaga mimivirus]                     | 230  | 100% | 8,00E-76  | 100.00% |
| 803 | 509  | 966772  | 968301  | - | Flavin-containing amine oxidoreductase [Acanthamoeba castellanii mamavirus]             | 1044 | 100% | 0.0       | 100.00% |
| 804 | 246  | 968351  | 969091  | - | hypothetical protein [Acanthamoeba castellanii mamavirus]                               | 508  | 100% | 0.0       | 100.00% |
| 805 | 482  | 970099  | 971547  | - | putative transposase [Acanthamoeba castellanii mamavirus]                               | 983  | 100% | 0.0       | 100.00% |
| 806 | 392  | 971698  | 972876  | + | hypothetical protein MIMI_gp0205 [Acanthamoeba polyphaga mimivirus]                     | 762  | 100% | 0.0       | 100.00% |
| 807 | 382  | 972936  | 974084  | + | hypothetical protein [Acanthamoeba castellanii mamavirus]                               | 757  | 100% | 0.0       | 100.00% |
| 808 | 408  | 974105  | 975331  | + | hypothetical protein [Acanthamoeba castellanii mamavirus]                               | 810  | 100% | 0.0       | 100.00% |
| 809 | 389  | 975406  | 976575  | + | hypothetical protein [Acanthamoeba castellanii mamavirus]                               | 784  | 100% | 0.0       | 100.00% |
| 810 | 379  | 976640  | 977779  | + | hypothetical protein HIRU_S787 [Hirudovirus strain Sangsue]                             | 752  | 100% | 0.0       | 100.00% |
| 811 | 367  | 977847  | 978950  | + | hypothetical protein [Acanthamoeba castellanii mamavirus]                               | 718  | 100% | 0.0       | 100.00% |
| 812 | 379  | 979020  | 980159  | + | hypothetical protein [Acanthamoeba castellanii mamavirus]                               | 748  | 100% | 0.0       | 100.00% |
| 813 | 378  | 980227  | 981363  | + | hypothetical protein [Acanthamoeba castellanii mamavirus]                               | 751  | 100% | 0.0       | 100.00% |
| 814 | 245  | 981515  | 982252  | + | hypothetical protein [Acanthamoeba castellanii mamavirus]                               | 479  | 100% | 2,00E-170 | 100.00% |
| 815 | 148  | 982315  | 982761  | + | hypothetical protein MIMI_L174a [Acanthamoeba polyphaga mimivirus]                      | 213  | 100% | 7,00E-67  | 81.17%  |
| 816 | 97   | 982803  | 983096  | + | hypothetical protein HIRU_S792 [Hirudovirus strain Sangsue]                             | 198  | 100% | 4,00E-64  | 98.97%  |
| 817 | 205  | 983209  | 983826  | + | putative ATP-dependent RNA helicase [Acanthamoeba castellanii mamavirus]                | 413  | 100% | 2,00E-145 | 100.00% |
| 818 | 391  | 983907  | 985082  | + | hypothetical protein [Acanthamoeba castellanii mamavirus]                               | 786  | 100% | 0.0       | 100.00% |
| 819 | 151  | 985191  | 985646  | + | hypothetical protein [Acanthamoeba castellanii mamavirus]                               | 306  | 100% | 5,00E-105 | 100.00% |
| 820 | 436  | 985791  | 987101  | + | FNIP repeat-containing protein [Acanthamoeba castellanii mamavirus]                     | 882  | 100% | 0.0       | 100.00% |
| 821 | 140  | 987175  | 987597  | + | hypothetical protein [Acanthamoeba castellanii mamavirus]                               | 290  | 100% | 6,00E-99  | 100.00% |
| 822 | 304  | 987769  | 988683  | + | hypothetical protein [Acanthamoeba castellanii mamavirus]                               | 604  | 100% | 0.0       | 100.00% |
| 823 | 251  | 988774  | 989529  | + | hypothetical protein [Acanthamoeba castellanii mamavirus]                               | 506  | 100% | 1,00E-180 | 100.00% |
| 824 | 271  | 989653  | 990468  | + | hypothetical protein lvs_L124 [Acanthamoeba polyphaga lentillevirus]                    | 544  | 100% | 0.0       | 100.00% |
| 825 | 509  | 990758  | 992287  | + | CysteinyI-tRNA synthetase [Acanthamoeba castellanii mamavirus]                          | 1053 | 100% | 0.0       | 100.00% |
| 826 | 136  | 992422  | 992832  | + | hypothetical protein MIMI_gp0181 [Acanthamoeba polyphaga mimivirus]                     | 286  | 100% | 2,00E-97  | 100.00% |
| 827 | 521  | 992900  | 994465  | + | putative FNIP repeat-containing protein [Acanthamoeba polyphaga mimivirus]              | 1048 | 100% | 0.0       | 100.00% |
| 828 | 433  | 994538  | 995839  | - | hypothetical protein MIMI_gp0179 [Acanthamoeba polyphaga mimivirus]                     | 874  | 100% | 0.0       | 100.00% |
| 829 | 433  | 995900  | 997201  | - | hypothetical protein [Acanthamoeba castellanii mamavirus]                               | 885  | 100% | 0.0       | 100.00% |
| 830 | 229  | 997587  | 998273  | - | putative transposase [Acanthamoeba polyphaga lentillevirus]                             | 452  | 100% | 2,00E-160 | 100.00% |
| 831 | 138  | 998717  | 999133  | - | hypothetical protein [Acanthamoeba castellanii mamavirus]                               | 286  | 100% | 2,00E-97  | 100.00% |
| 832 | 370  | 999243  | 1000355 | - | hypothetical protein [Acanthamoeba castellanii mamavirus]                               | 739  | 100% | 0.0       | 100.00% |
| 833 | 504  | 1000505 | 1002019 | + | hypothetical protein [Acanthamoeba castellanii mamavirus]                               | 998  | 100% | 0.0       | 100.00% |
| 834 | 253  | 1002132 | 1002893 | - | hypothetical protein [Acanthamoeba castellanii mamavirus]                               | 527  | 100% | 0.0       | 100.00% |
| 835 | 142  | 1002905 | 1003333 | - | hypothetical protein [Acanthamoeba castellanii mamavirus]                               | 287  | 100% | 7,00E-98  | 100.00% |
| 836 | 467  | 1003371 | 1004774 | - | WD40 superfamily protein [Acanthamoeba castellanii mamavirus]                           | 945  | 100% | 0.0       | 100.00% |
| 837 | 152  | 1004827 | 1005285 | + | hypothetical protein MIMI_gp0171 [Acanthamoeba polyphaga mimivirus]                     | 307  | 100% | 3,00E-105 | 100.00% |
| 838 | 566  | 1005385 | 1007085 | - | hypothetical protein [Acanthamoeba castellanii mamavirus]                               | 1150 | 100% | 0.0       | 100.00% |
| 839 | 206  | 1007198 | 1007818 | - | N-acetyltransferase [Acanthamoeba castellanii mamavirus]                                | 421  | 100% | 1,00E-148 | 100.00% |
| 840 | 266  | 1008012 | 1008812 | - | hypothetical protein [Acanthamoeba castellanii mamavirus]                               | 553  | 100% | 0.0       | 100.00% |
| 841 | 173  | 1009091 | 1009612 | + | hypothetical protein [Acanthamoeba castellanii mamavirus]                               | 343  | 100% | 4,00E-119 | 100.00% |
| 842 | 229  | 1009679 | 1010368 | + | ankyrin repeat-containing protein [Acanthamoeba castellanii mamavirus]                  | 461  | 100% | 9,00E-164 | 100.00% |
| 843 | 279  | 1010413 | 1011252 | + | hypothetical protein MIMI_gp0165 [Acanthamoeba polyphaga mimivirus]                     | 568  | 100% | 0.0       | 100.00% |

|     |      |         |         |   |                                                                                       |      |      |           |         |
|-----|------|---------|---------|---|---------------------------------------------------------------------------------------|------|------|-----------|---------|
| 844 | 346  | 1011308 | 1012348 | + | hypothetical protein MIMI_gp0164 [Acanthamoeba polyphaga mimivirus]                   | 685  | 100% | 0.0       | 100.00% |
| 845 | 274  | 1012431 | 1013255 | + | hypothetical protein MIMI_gp0163 [Acanthamoeba polyphaga mimivirus]                   | 556  | 100% | 0.0       | 100.00% |
| 846 | 233  | 1013314 | 1014015 | + | hypothetical protein MIMI_gp0162 [Acanthamoeba polyphaga mimivirus]                   | 470  | 100% | 4,00E-167 | 100.00% |
| 847 | 287  | 1014121 | 1014984 | - | putative exoV-like protein [Acanthamoeba polyphaga mimivirus]                         | 594  | 100% | 0.0       | 100.00% |
| 848 | 490  | 1015076 | 1016548 | + | putative WbbJ Acetyltransferase [Acanthamoeba polyphaga mimivirus]                    | 998  | 100% | 0.0       | 100.00% |
| 849 | 323  | 1016706 | 1017677 | - | putative dTDP-D-glucose 4,6-dehydratase [Acanthamoeba polyphaga mimivirus]            | 669  | 100% | 0.0       | 100.00% |
| 850 | 304  | 1017829 | 1018743 | + | hypothetical protein MIMI_gp0157 [Acanthamoeba polyphaga mimivirus]                   | 626  | 100% | 0.0       | 100.00% |
| 851 | 248  | 1018691 | 1019437 | - | uncharacterized glycosyltransferase [Acanthamoeba polyphaga mimivirus]                | 517  | 100% | 0.0       | 100.00% |
| 852 | 883  | 1019466 | 1022117 | + | hypothetical protein MIMI_gp0156 [Acanthamoeba polyphaga mimivirus]                   | 1798 | 100% | 0.0       | 100.00% |
| 853 | 721  | 1022220 | 1024385 | + | hypothetical protein [Acanthamoeba castellanii mamavirus]                             | 1485 | 100% | 0.0       | 100.00% |
| 854 | 352  | 1024404 | 1025462 | - | Aminotransferase [Acanthamoeba castellanii mamavirus]                                 | 722  | 100% | 0.0       | 100.00% |
| 855 | 702  | 1025546 | 1027654 | - | choline dehydrogenase-like protein [Acanthamoeba castellanii mamavirus]               | 1448 | 100% | 0.0       | 100.00% |
| 856 | 193  | 1027786 | 1028367 | + | hypothetical protein [Acanthamoeba castellanii mamavirus]                             | 396  | 100% | 2,00E-139 | 100.00% |
| 857 | 127  | 1028438 | 1028821 | - | hypothetical protein MIMI_gp0151 [Acanthamoeba polyphaga mimivirus]                   | 252  | 100% | 2,00E-84  | 100.00% |
| 858 | 221  | 1028928 | 1029593 | - | Methyltransferase family protein [Acanthamoeba castellanii mamavirus]                 | 454  | 100% | 2,00E-161 | 100.00% |
| 859 | 178  | 1029667 | 1030203 | - | hypothetical protein lvs_R89 [Acanthamoeba polyphaga lentillevirus]                   | 358  | 100% | 2,00E-124 | 100.00% |
| 860 | 421  | 1030331 | 1031596 | - | hypothetical protein [Acanthamoeba castellanii mamavirus]                             | 832  | 100% | 0.0       | 100.00% |
| 861 | 70   | 1031702 | 1031914 | + | hypothetical protein MIMI_gp0146 [Acanthamoeba polyphaga mimivirus]                   | 144  | 100% | 4,00E-43  | 100.00% |
| 862 | 563  | 1032054 | 1033745 | + | Choline dehydrogenase [Acanthamoeba castellanii mamavirus]                            | 1159 | 100% | 0.0       | 100.00% |
| 863 | 269  | 1033876 | 1034685 | - | putative F-box protein [Acanthamoeba polyphaga mimivirus]                             | 555  | 100% | 0.0       | 100.00% |
| 864 | 255  | 1034781 | 1035548 | + | putative F-box protein [Acanthamoeba polyphaga mimivirus]                             | 524  | 100% | 0.0       | 100.00% |
| 865 | 196  | 1035545 | 1036135 | - | BRO-M family protein [Acanthamoeba castellanii mamavirus]                             | 398  | 100% | 8,00E-140 | 100.00% |
| 866 | 346  | 1036256 | 1037296 | + | Tyrosyl-tRNA synthetase [Acanthamoeba castellanii mamavirus]                          | 720  | 100% | 0.0       | 100.00% |
| 867 | 83   | 1037458 | 1037709 | + | hypothetical protein MIMI_gp0140 [Acanthamoeba polyphaga mimivirus]                   | 177  | 100% | 6,00E-56  | 98.80%  |
| 868 | 627  | 1037777 | 1039660 | + | ankyrin repeat-containing protein [Acanthamoeba castellanii mamavirus]                | 1273 | 100% | 0.0       | 100.00% |
| 869 | 324  | 1039774 | 1040748 | + | ankyrin repeat-containing protein [Acanthamoeba castellanii mamavirus]                | 651  | 100% | 0.0       | 100.00% |
| 870 | 339  | 1040816 | 1041835 | + | ankyrin repeat-containing protein [Acanthamoeba castellanii mamavirus]                | 682  | 100% | 0.0       | 100.00% |
| 871 | 75   | 1041807 | 1042034 | - | hypothetical protein HIRU_S850 [Hirudovirus strain Sangsue]                           | 155  | 100% | 1,00E-47  | 100.00% |
| 872 | 165  | 1042074 | 1042571 | - | hypothetical protein [Acanthamoeba castellanii mamavirus]                             | 335  | 100% | 6,00E-116 | 100.00% |
| 873 | 356  | 1042653 | 1043723 | - | hypothetical protein MIMI_gp0135 [Acanthamoeba polyphaga mimivirus]                   | 741  | 100% | 0.0       | 100.00% |
| 874 | 97   | 1043829 | 1044122 | + | hypothetical protein [Acanthamoeba castellanii mamavirus]                             | 201  | 100% | 3,00E-65  | 100.00% |
| 875 | 535  | 1044303 | 1045910 | + | hypothetical protein [Acanthamoeba castellanii mamavirus]                             | 1097 | 100% | 0.0       | 100.00% |
| 876 | 1261 | 1046011 | 1049796 | + | Helicase, SNF2 family [Acanthamoeba castellanii mamavirus]                            | 2581 | 100% | 0.0       | 99.92%  |
| 877 | 67   | 1049875 | 1050078 | + | hypothetical protein [Acanthamoeba castellanii mamavirus]                             | 142  | 100% | 1,00E-42  | 100.00% |
| 878 | 183  | 1051229 | 1051780 | + | hypothetical protein [Acanthamoeba castellanii mamavirus]                             | 366  | 100% | 9,00E-128 | 100.00% |
| 879 | 458  | 1051857 | 1053233 | + | ankyrin repeat-containing protein [Acanthamoeba castellanii mamavirus]                | 932  | 100% | 0.0       | 100.00% |
| 880 | 374  | 1053303 | 1054427 | - | hypothetical protein [Acanthamoeba castellanii mamavirus]                             | 766  | 100% | 0.0       | 100.00% |
| 881 | 150  | 1054717 | 1055169 | + | hypothetical protein [Acanthamoeba castellanii mamavirus]                             | 302  | 100% | 1,00E-103 | 100.00% |
| 882 | 150  | 1055306 | 1055758 | + | hypothetical protein [Acanthamoeba castellanii mamavirus]                             | 299  | 100% | 3,00E-102 | 100.00% |
| 883 | 251  | 1055745 | 1056500 | + | ankyrin repeat-containing protein [Acanthamoeba castellanii mamavirus]                | 504  | 100% | 6,00E-180 | 100.00% |
| 884 | 279  | 1056586 | 1057425 | + | Proliferating cell nuclear antigen [Acanthamoeba castellanii mamavirus]               | 549  | 100% | 0.0       | 100.00% |
| 885 | 498  | 1057558 | 1059054 | + | Proliferating cell nuclear antigen [Acanthamoeba castellanii mamavirus]               | 549  | 100% | 0.0       | 100.00% |
| 886 | 420  | 1059093 | 1060355 | - | BTB domain-containing protein [Acanthamoeba castellanii mamavirus]                    | 1009 | 100% | 0.0       | 100.00% |
| 887 | 415  | 1060521 | 1061768 | + | BTB domain-containing protein [Acanthamoeba castellanii mamavirus]                    | 834  | 100% | 0.0       | 100.00% |
| 888 | 344  | 1061917 | 1062951 | + | hypothetical protein [Acanthamoeba castellanii mamavirus]                             | 707  | 100% | 0.0       | 100.00% |
| 889 | 599  | 1063141 | 1064940 | + | ankyrin repeat-containing protein [Acanthamoeba castellanii mamavirus]                | 1221 | 100% | 0.0       | 100.00% |
| 890 | 272  | 1065100 | 1065918 | + | ankyrin repeat-containing protein [Acanthamoeba castellanii mamavirus]                | 555  | 100% | 0.0       | 100.00% |
| 891 | 503  | 1065987 | 1067498 | + | BTB domain-containing protein [Acanthamoeba castellanii mamavirus]                    | 1008 | 100% | 0.0       | 100.00% |
| 892 | 279  | 1067561 | 1068400 | - | hypothetical protein [Acanthamoeba castellanii mamavirus]                             | 572  | 100% | 0.0       | 100.00% |
| 893 | 1025 | 1068497 | 1071574 | - | ankyrin repeat-containing protein [Acanthamoeba castellanii mamavirus]                | 2080 | 100% | 0.0       | 100.00% |
| 894 | 327  | 1071740 | 1072723 | + | ankyrin repeat-containing protein [Acanthamoeba castellanii mamavirus]                | 666  | 100% | 0.0       | 100.00% |
| 895 | 175  | 1072810 | 1073337 | + | hypothetical protein [Acanthamoeba castellanii mamavirus]                             | 362  | 100% | 3,00E-126 | 100.00% |
| 896 | 808  | 1073460 | 1075886 | + | ankyrin repeat-containing protein [Acanthamoeba castellanii mamavirus]                | 1640 | 100% | 0.0       | 100.00% |
| 897 | 764  | 1076015 | 1078309 | + | putative ankyrin repeat protein [Acanthamoeba polyphaga mimivirus]                    | 1551 | 100% | 0.0       | 100.00% |
| 898 | 502  | 1078441 | 1079949 | + | putative BTB/POZ domain-containing protein [Acanthamoeba polyphaga mimivirus]         | 1007 | 100% | 0.0       | 100.00% |
| 899 | 879  | 1080548 | 1083187 | + | ankyrin repeat-containing protein [Acanthamoeba castellanii mamavirus]                | 1767 | 100% | 0.0       | 100.00% |
| 900 | 171  | 1083306 | 1083821 | + | hypothetical protein MIMI_gp0105 [Acanthamoeba polyphaga mimivirus]                   | 355  | 100% | 7,00E-124 | 100.00% |
| 901 | 576  | 1083952 | 1085682 | + | putative ankyrin repeat protein [Acanthamoeba polyphaga mimivirus]                    | 1162 | 100% | 0.0       | 100.00% |
| 902 | 559  | 1085800 | 1087479 | + | putative BTB/POZ domain-containing protein [Mimivirus reunion]                        | 1123 | 100% | 0.0       | 99.64%  |
| 903 | 133  | 1087802 | 1088203 | - | hypothetical protein MIMI_gp0100 [Acanthamoeba polyphaga mimivirus]                   | 273  | 100% | 3,00E-92  | 100.00% |
| 904 | 181  | 1088477 | 1089022 | + | hypothetical protein MIMI_gp0099 [Acanthamoeba polyphaga mimivirus]                   | 374  | 100% | 8,00E-131 | 100.00% |
| 905 | 200  | 1089141 | 1089743 | + | ankyrin repeat-containing protein [Acanthamoeba castellanii mamavirus]                | 422  | 100% | 5,00E-149 | 100.00% |
| 906 | 99   | 1090221 | 1090520 | + | hypothetical protein [Acanthamoeba castellanii mamavirus]                             | 198  | 100% | 5,00E-64  | 100.00% |
| 907 | 103  | 1090588 | 1090899 | + | hypothetical protein MIMI_gp0095 [Acanthamoeba polyphaga mimivirus]                   | 208  | 100% | 9,00E-68  | 100.00% |
| 908 | 87   | 1091005 | 1091268 | + | hypothetical protein MIMI_gp0094 [Acanthamoeba polyphaga mimivirus]                   | 174  | 100% | 1,00E-54  | 100.00% |
| 909 | 242  | 1091525 | 1092253 | + | hypothetical protein MIMI_gp0093 [Acanthamoeba polyphaga mimivirus]                   | 493  | 100% | 4,00E-176 | 100.00% |
| 910 | 553  | 1092365 | 1094026 | + | hypothetical protein lvs_L46 [Acanthamoeba polyphaga lentillevirus]                   | 1090 | 100% | 0.0       | 100.00% |
| 911 | 378  | 1094144 | 1095280 | - | ankyrin repeat-containing protein [Acanthamoeba castellanii mamavirus]                | 751  | 100% | 0.0       | 100.00% |
| 912 | 143  | 1095388 | 1095819 | + | hypothetical protein [Acanthamoeba castellanii mamavirus]                             | 278  | 100% | 5,00E-94  | 100.00% |
| 913 | 308  | 1095940 | 1096866 | + | hypothetical protein [Acanthamoeba castellanii mamavirus]                             | 607  | 100% | 0.0       | 100.00% |
| 914 | 238  | 1097571 | 1098287 | + | hypothetical protein [Acanthamoeba castellanii mamavirus]                             | 489  | 100% | 2,00E-174 | 100.00% |
| 915 | 227  | 1098502 | 1099185 | - | hypothetical protein [Acanthamoeba castellanii mamavirus]                             | 449  | 100% | 4,00E-159 | 100.00% |
| 916 | 384  | 1099345 | 1100499 | + | ankyrin repeat-containing protein [Acanthamoeba castellanii mamavirus]                | 764  | 100% | 0.0       | 100.00% |
| 917 | 894  | 1100851 | 1103535 | + | Collagen triple helix repeat containing protein [Acanthamoeba castellanii mamavirus]  | 1563 | 100% | 0.0       | 100.00% |
| 918 | 312  | 1103635 | 1104573 | - | hypothetical protein MIMI_gp0085 [Acanthamoeba polyphaga mimivirus]                   | 640  | 100% | 0.0       | 100.00% |
| 919 | 231  | 1104755 | 1105450 | + | hypothetical protein MIMI_gp0084 [Acanthamoeba polyphaga mimivirus]                   | 468  | 100% | 3,00E-166 | 100.00% |
| 920 | 243  | 1105710 | 1106441 | + | ankyrin repeat-containing protein [Hirudovirus strain Sangsue]                        | 487  | 100% | 1,00E-173 | 100.00% |
| 921 | 498  | 1106595 | 1108091 | + | hypothetical protein [Acanthamoeba castellanii mamavirus]                             | 994  | 100% | 0.0       | 100.00% |
| 922 | 587  | 1108250 | 1110013 | + | Putative ankyrin repeat protein L66 [Acanthamoeba polyphaga mimivirus]                | 1148 | 100% | 0.0       | 100.00% |
| 923 | 355  | 1110167 | 1111234 | + | uncharacterized virion-associated membrane protein [Acanthamoeba polyphaga mimivirus] | 724  | 100% | 0.0       | 100.00% |
| 924 | 565  | 1111466 | 1113163 | + | hypothetical protein [Acanthamoeba castellanii mamavirus]                             | 1147 | 100% | 0.0       | 100.00% |
| 925 | 580  | 1113281 | 1115023 | + | ankyrin repeat-containing protein [Acanthamoeba castellanii mamavirus]                | 1172 | 100% | 0.0       | 100.00% |
| 926 | 119  | 1115076 | 1115435 | + | hypothetical protein [Acanthamoeba castellanii mamavirus]                             | 234  | 100% | 2,00E-77  | 100.00% |
| 927 | 282  | 1115529 | 1116377 | + | ankyrin-containing protein [Acanthamoeba polyphaga mimivirus]                         | 739  | 100% | 0.0       | 93.62%  |
| 928 | 62   | 1116467 | 1116655 | + | hypothetical protein [Acanthamoeba castellanii mamavirus]                             | 115  | 100% | 2,00E-32  | 100.00% |
| 929 | 146  | 1116731 | 1117171 | - | hypothetical protein [Acanthamoeba castellanii mamavirus]                             | 301  | 100% | 3,00E-103 | 99.32%  |
| 930 | 496  | 1117346 | 1118836 | - | WD-repeat family protein [Acanthamoeba castellanii mamavirus]                         | 998  | 100% | 0.0       | 100.00% |
| 931 | 621  | 1119273 | 1121138 | + | putative F-box and FNIP repeat-containing protein [Acanthamoeba polyphaga mimivirus]  | 1244 | 100% | 0.0       | 100.00% |
| 932 | 307  | 1121230 | 1122153 | + | putative ankyrin repeat protein [Acanthamoeba polyphaga mimivirus]                    | 630  | 100% | 0.0       | 100.00% |
| 933 | 131  | 1122262 | 1122657 | - | hypothetical protein [Acanthamoeba castellanii mamavirus]                             | 253  | 100% | 2,00E-84  | 100.00% |
| 934 | 182  | 1122833 | 1123381 | + | hypothetical protein [Acanthamoeba castellanii mamavirus]                             | 367  | 100% | 5,00E-128 | 100.00% |
| 935 | 604  | 1123498 | 1125312 | + | ankyrin repeat-containing protein [Acanthamoeba castellanii mamavirus]                | 1221 | 100% | 0.0       | 100.00% |
| 936 | 513  | 1125499 | 1127040 | + | hypothetical protein [Acanthamoeba castellanii mamavirus]                             | 1034 | 100% | 0.0       | 100.00% |
| 937 | 182  | 1127119 | 1127667 | + | hypothetical protein [Acanthamoeba castellanii mamavirus]                             | 367  | 100% | 7,00E-128 | 100.00% |

|      |      |         |         |   |                                                                                            |      |      |           |         |
|------|------|---------|---------|---|--------------------------------------------------------------------------------------------|------|------|-----------|---------|
| 938  | 100  | 1127740 | 1128042 | + | hypothetical protein MIMI_gp0065 [Acanthamoeba polyphaga mimivirus]                        | 172  | 100% | 1,00E-53  | 100.00% |
| 939  | 127  | 1128124 | 1128507 | + | hypothetical protein HIRU_5925 [Hirudovirus strain Sangsue]                                | 254  | 100% | 3,00E-85  | 100.00% |
| 940  | 159  | 1128637 | 1129116 | + | hypothetical protein [Acanthamoeba castellanii mamavirus]                                  | 327  | 100% | 5,00E-113 | 100.00% |
| 941  | 113  | 1129164 | 1129505 | - | hypothetical protein [Acanthamoeba castellanii mamavirus]                                  | 233  | 100% | 2,00E-77  | 100.00% |
| 942  | 186  | 1129664 | 1130224 | + | hypothetical protein [Acanthamoeba castellanii mamavirus]                                  | 373  | 100% | 3,00E-130 | 100.00% |
| 943  | 120  | 1130378 | 1130740 | + | hypothetical protein [Acanthamoeba castellanii mamavirus]                                  | 245  | 100% | 6,00E-82  | 100.00% |
| 944  | 100  | 1130764 | 1131066 | - | No significant similarity found                                                            | -    | -    | -         | -       |
| 945  | 201  | 1131282 | 1131887 | - | hypothetical protein MIMI_gp0058 [Acanthamoeba polyphaga mimivirus]                        | 405  | 100% | 2,00E-142 | 100.00% |
| 946  | 164  | 1132095 | 1132589 | + | hypothetical protein MIMI_gp0057 [Acanthamoeba polyphaga mimivirus]                        | 343  | 100% | 4,00E-119 | 100.00% |
| 947  | 227  | 1132878 | 1133561 | + | putative ankryrin repeat protein [Acanthamoeba polyphaga mimivirus]                        | 458  | 100% | 1,00E-162 | 100.00% |
| 948  | 215  | 1133623 | 1134270 | - | hypothetical protein MIMI_gp0055 [Acanthamoeba polyphaga mimivirus]                        | 433  | 100% | 4,00E-153 | 100.00% |
| 949  | 212  | 1134405 | 1135043 | + | hypothetical protein MIMI_gp0054 [Acanthamoeba polyphaga mimivirus]                        | 430  | 100% | 7,00E-152 | 100.00% |
| 950  | 51   | 1135083 | 1135238 | + | hypothetical protein MIMI_gp0053 [Acanthamoeba polyphaga mimivirus]                        | 105  | 100% | 2,00E-28  | 100.00% |
| 951  | 357  | 1135393 | 1136466 | + | putative ankryrin repeat protein [Acanthamoeba polyphaga mimivirus]                        | 726  | 100% | 0.0       | 100.00% |
| 952  | 478  | 1136557 | 1137993 | + | hypothetical protein MIMI_gp0051 [Acanthamoeba polyphaga mimivirus]                        | 971  | 100% | 0.0       | 100.00% |
| 953  | 58   | 1138077 | 1138253 | + | hypothetical protein MIMI_gp0050 [Acanthamoeba polyphaga mimivirus]                        | 118  | 100% | 2,00E-33  | 100.00% |
| 954  | 91   | 1138463 | 1138738 | + | hypothetical protein MIMI_gp0049 [Acanthamoeba polyphaga mimivirus]                        | 177  | 100% | 8,00E-56  | 100.00% |
| 955  | 101  | 1138950 | 1139255 | - | hypothetical protein MIMI_gp0048 [Acanthamoeba polyphaga mimivirus]                        | 194  | 100% | 4,00E-62  | 100.00% |
| 956  | 150  | 1139539 | 1139991 | + | hypothetical protein MIMI_gp0047 [Acanthamoeba polyphaga mimivirus]                        | 312  | 100% | 5,00E-107 | 100.00% |
| 957  | 113  | 1140122 | 1140463 | + | hypothetical protein [Acanthamoeba castellanii mamavirus]                                  | 222  | 100% | 6,00E-73  | 99.12%  |
| 958  | 97   | 1140417 | 1140710 | + | putative ankryrin repeat protein [Acanthamoeba polyphaga mimivirus]                        | 196  | 100% | 3,00E-63  | 100.00% |
| 959  | 189  | 1140938 | 1141507 | + | putative ankryrin repeat protein [Acanthamoeba polyphaga mimivirus]                        | 375  | 100% | 5,00E-131 | 100.00% |
| 960  | 90   | 1141553 | 1141825 | + | hypothetical protein [Acanthamoeba polyphaga mimivirus]                                    | 171  | 100% | 1,00E-53  | 98.89%  |
| 961  | 487  | 1142008 | 1143471 | + | putative Kila-N domain-containing protein [Acanthamoeba polyphaga mimivirus]               | 979  | 100% | 0.0       | 100.00% |
| 962  | 116  | 1143612 | 1143962 | + | hypothetical protein [Acanthamoeba castellanii mamavirus]                                  | 229  | 100% | 1,00E-75  | 99.14%  |
| 963  | 187  | 1144016 | 1144579 | + | ankryrin repeat-containing protein [Acanthamoeba castellanii mamavirus]                    | 376  | 100% | 2,00E-131 | 100.00% |
| 964  | 493  | 1144682 | 1146163 | + | hypothetical protein [Acanthamoeba castellanii mamavirus]                                  | 982  | 100% | 0.0       | 100.00% |
| 965  | 84   | 1146191 | 1146445 | + | hypothetical protein [Acanthamoeba castellanii mamavirus]                                  | 171  | 100% | 9,00E-54  | 100.00% |
| 966  | 409  | 1146549 | 1147778 | - | hypothetical protein [Acanthamoeba castellanii mamavirus]                                  | 810  | 100% | 0.0       | 100.00% |
| 967  | 73   | 1147953 | 1148174 | + | hypothetical protein [Acanthamoeba castellanii mamavirus]                                  | 143  | 100% | 8,00E-43  | 100.00% |
| 968  | 545  | 1148340 | 1149977 | + | Kila N-domain-containing protein [Acanthamoeba castellanii mamavirus]                      | 1105 | 100% | 0.0       | 100.00% |
| 969  | 108  | 1150168 | 1150494 | - | hypothetical protein MIMI_gp0032 [Acanthamoeba polyphaga mimivirus]                        | 227  | 100% | 4,00E-75  | 100.00% |
| 970  | 94   | 1150552 | 1150836 | + | hypothetical protein [Acanthamoeba castellanii mamavirus]                                  | 189  | 100% | 1,00E-60  | 100.00% |
| 971  | 104  | 1150794 | 1151108 | + | hypothetical protein MIMI_gp0031 [Acanthamoeba polyphaga mimivirus]                        | 207  | 100% | 4,00E-67  | 100.00% |
| 972  | 146  | 1151255 | 1151695 | + | hypothetical protein MIMI_gp0030 [Acanthamoeba polyphaga mimivirus]                        | 295  | 100% | 8,00E-101 | 100.00% |
| 973  | 104  | 1151863 | 1152177 | + | hypothetical protein MIMI_gp0029 [Acanthamoeba polyphaga mimivirus]                        | 216  | 100% | 5,00E-71  | 100.00% |
| 974  | 326  | 1152184 | 1153164 | + | ankryrin repeat-containing protein [Acanthamoeba castellanii mamavirus]                    | 648  | 100% | 0.0       | 100.00% |
| 975  | 102  | 1153381 | 1153689 | - | hypothetical protein [Acanthamoeba castellanii mamavirus]                                  | 212  | 100% | 3,00E-69  | 100.00% |
| 976  | 63   | 1153688 | 1153879 | + | No significant similarity found                                                            | -    | -    | -         | -       |
| 977  | 236  | 1154152 | 1154862 | + | ankryrin repeat-containing protein [Acanthamoeba castellanii mamavirus]                    | 473  | 100% | 4,00E-168 | 100.00% |
| 978  | 122  | 1154988 | 1155356 | + | putative ankryrin repeat protein [Acanthamoeba polyphaga mimivirus]                        | 238  | 100% | 6,00E-79  | 100.00% |
| 979  | 533  | 1155490 | 1157091 | + | putative sel1-like repeat-containing protein [Acanthamoeba polyphaga mimivirus]            | 1085 | 100% | 0.0       | 100.00% |
| 980  | 92   | 1157276 | 1157554 | + | hypothetical protein MIMI_gp0023 [Acanthamoeba polyphaga mimivirus]                        | 188  | 100% | 8,00E-60  | 100.00% |
| 981  | 123  | 1157695 | 1158066 | + | hypothetical protein MIMI_gp0022 [Acanthamoeba polyphaga mimivirus]                        | 245  | 100% | 8,00E-82  | 100.00% |
| 982  | 584  | 1158186 | 1159940 | + | putative sel1-like repeat-containing protein [Acanthamoeba polyphaga mimivirus]            | 1154 | 100% | 0.0       | 98.12%  |
| 983  | 359  | 1160414 | 1161493 | + | hypothetical protein [Acanthamoeba castellanii mamavirus]                                  | 717  | 100% | 0.0       | 100.00% |
| 984  | 269  | 1161606 | 1162415 | + | hypothetical protein MIMI_gp0019 [Acanthamoeba polyphaga mimivirus]                        | 541  | 100% | 0.0       | 100.00% |
| 985  | 91   | 1162626 | 1162901 | + | hypothetical protein MIMI_gp0018 [Acanthamoeba polyphaga mimivirus]                        | 193  | 100% | 4,00E-62  | 100.00% |
| 986  | 143  | 1163334 | 1163765 | + | hypothetical protein [Acanthamoeba castellanii mamavirus]                                  | 295  | 100% | 7,00E-101 | 100.00% |
| 987  | 338  | 1164199 | 1165215 | + | poly(A) polymerase small subunit [Megavirus chilensis]                                     | 600  | 99%  | 0.0       | 90.56%  |
| 988  | 213  | 1166940 | 1167581 | + | hypothetical protein [Acanthamoeba castellanii mamavirus]                                  | 353  | 81%  | 6,00E-122 | 100.00% |
| 989  | 181  | 1170371 | 1170916 | + | hypothetical protein [Cotonovirus japonicus]                                               | 194  | 62%  | 9,00E-61  | 85.09%  |
| 990  | 53   | 1171816 | 1171977 | + | No significant similarity found                                                            | -    | -    | -         | -       |
| 991  | 67   | 1172586 | 1172789 | - | putative membrane protein [Acanthamoeba castellanii mamavirus]                             | 58.5 | 62%  | 2,00E-09  | 69.05%  |
| 992  | 73   | 1174120 | 1174341 | + | No significant similarity found                                                            | -    | -    | -         | -       |
| 993  | 312  | 1176386 | 1177324 | - | hypothetical protein [Acanthamoeba castellanii mamavirus]                                  | 630  | 100% | 0.0       | 100.00% |
| 994  | 147  | 1177517 | 1177960 | + | hypothetical protein [Acanthamoeba castellanii mamavirus]                                  | 295  | 100% | 9,00E-101 | 100.00% |
| 995  | 408  | 1178190 | 1179416 | + | hypothetical protein [Mimivirus reunion]                                                   | 636  | 100% | 0.0       | 84.31%  |
| 996  | 481  | 1179711 | 1181156 | + | Kila N-terminal domain, N1R/P28 DNA binding protein [Acanthamoeba polyphaga lentillevirus] | 586  | 58%  | 0.0       | 100.00% |
| 997  | 393  | 1181804 | 1182985 | + | Kila N-terminal domain, N1R/P28 DNA binding protein [Acanthamoeba polyphaga lentillevirus] | 785  | 100% | 0.0       | 100.00% |
| 998  | 242  | 1183101 | 1183829 | + | Kila N family protein [Acanthamoeba castellanii mamavirus]                                 | 462  | 98%  | 2,00E-163 | 97.48%  |
| 999  | 669  | 1184167 | 1186176 | + | hypothetical protein [Acanthamoeba castellanii mamavirus]                                  | 1337 | 100% | 0.0       | 100.00% |
| 1000 | 110  | 1186259 | 1186591 | + | putative Bro-N domain-containing protein [Hirudovirus strain Sangsue]                      | 209  | 92%  | 8,00E-67  | 99.02%  |
| 1001 | 93   | 1186866 | 1187147 | - | hypothetical protein [Acanthamoeba castellanii mamavirus]                                  | 190  | 100% | 6,00E-61  | 100.00% |
| 1002 | 1052 | 1187472 | 1190630 | - | Helicase [Acanthamoeba castellanii mamavirus]                                              | 2130 | 100% | 0.0       | 100.00% |
| 1003 | 155  | 1190825 | 1191292 | + | hypothetical protein [Acanthamoeba castellanii mamavirus]                                  | 308  | 100% | 2,00E-105 | 100.00% |
| 1004 | 125  | 1191676 | 1192053 | + | hypothetical protein [Acanthamoeba castellanii mamavirus]                                  | 235  | 100% | 1,00E-77  | 100.00% |
| 1005 | 311  | 1192047 | 1192982 | - | BRO-N domain containing protein [Acanthamoeba castellanii mamavirus]                       | 636  | 100% | 0.0       | 100.00% |
| 1006 | 311  | 1193931 | 1194866 | + | BRO-N domain containing protein [Acanthamoeba castellanii mamavirus]                       | 636  | 100% | 0.0       | 100.00% |
| 1007 | 125  | 1194860 | 1195237 | + | hypothetical protein [Acanthamoeba castellanii mamavirus]                                  | 235  | 100% | 1,00E-77  | 100.00% |
| 1008 | 155  | 1195621 | 1196088 | - | hypothetical protein [Acanthamoeba castellanii mamavirus]                                  | 308  | 100% | 2,00E-105 | 100.00% |
| 1009 | 1052 | 1196283 | 1199441 | + | Helicase [Acanthamoeba castellanii mamavirus]                                              | 2130 | 100% | 0.0       | 100.00% |
| 1010 | 93   | 1197966 | 1200047 | + | hypothetical protein [Acanthamoeba castellanii mamavirus]                                  | 190  | 100% | 6,00E-61  | 100.00% |
| 1011 | 110  | 1200322 | 1200654 | - | putative Bro-N domain-containing protein [Hirudovirus strain Sangsue]                      | 209  | 92%  | 8,00E-67  | 99.02%  |
| 1012 | 669  | 1200737 | 1202746 | - | hypothetical protein [Acanthamoeba castellanii mamavirus]                                  | 1337 | 100% | 0.0       | 100.00% |

Note: aa: amino acids nr: non reduntant protein sequences database

Table S2 - Detailed annotation of sputnik argentum genome through BLASTp and HHpred analysis

| ORF | Size (aa) | Start | Stop  | Strand | Best hit Blastp (nr)                                            | Score | Query cover | e-value   | Identity | HHpred best hit                                                                | Probability (%) | e-value  |
|-----|-----------|-------|-------|--------|-----------------------------------------------------------------|-------|-------------|-----------|----------|--------------------------------------------------------------------------------|-----------------|----------|
| 1   | 144       | 369   | 803   | +      | V1 [Sputnik virophage]                                          | 277   | 100%        | 1,00E-93  | 100.00%  | C4-type zinc ribbon domain [Chlamydia trachomatis 434/Bu]                      | 87.68           | 0.54     |
| 2   | 114       | 859   | 1203  | +      | V2 [Sputnik virophage]                                          | 226   | 100%        | 2,00E-74  | 100.00%  | No hit                                                                         | -               | -        |
| 3   | 245       | 1457  | 2194  | -      | V3 [Sputnik virophage]                                          | 499   | 100%        | 2,00E-178 | 100.00%  | FtsK-HerA superfamily, P-loop ATPase [Sulfolobus turreted icosahedral virus 2] | 99.53           | 2.9e-12  |
| 4   | 139       | 2285  | 2704  | +      | V4 [Sputnik virophage]                                          | 291   | 100%        | 2,00E-99  | 100.00%  | C2H2-type zinc finger [Drosophila melanogaster]                                | 97.86           | 0.000017 |
| 5   | 119       | 3113  | 3472  | +      | V5 [Sputnik virophage]                                          | 228   | 100%        | 5,00E-75  | 100.00%  | No hit                                                                         | -               | -        |
| 6   | 310       | 3523  | 4455  | +      | V6 [Sputnik virophage]                                          | 595   | 100%        | 0.0       | 100.00%  | Collagen alpha-2(I) chain [Battus norvegicus]                                  | 97.66           | 0.0031   |
| 7   | 236       | 4493  | 5203  | +      | V7 [Sputnik virophage]                                          | 457   | 100%        | 9,00E-162 | 100.00%  | COLLAGEN-LIKE PROTEIN [Bacillus anthracis]                                     | 98.62           | 0.000032 |
| 8   | 184       | 5225  | 5779  | +      | V8 [Sputnik virophage]                                          | 361   | 100%        | 1,00E-125 | 100.00%  | No hit                                                                         | -               | -        |
| 9   | 175       | 5815  | 6342  | +      | V9 [Sputnik virophage]                                          | 357   | 100%        | 2,00E-124 | 100.00%  | Cysteine proteinases superfamily [Mastadenovirus H2]                           | 99.82           | 2.2e-19  |
| 10  | 226       | 6550  | 7230  | -      | V10 [Sputnik virophage]                                         | 459   | 100%        | 4,00E-163 | 100.00%  | Site-specific recombinase [Escherichia coli]                                   | 99.88           | 6.7e-21  |
| 11  | 162       | 7317  | 7805  | +      | hypothetical protein Sputnik2_B11 [Sputnik virophage 2]         | 317   | 100%        | 1,00E-108 | 100.00%  | No hit                                                                         | -               | -        |
| 12  | 152       | 8509  | 8967  | +      | V12 [Sputnik virophage]                                         | 292   | 100%        | 2,00E-99  | 100.00%  | No hit                                                                         | -               | -        |
| 13  | 779       | 9409  | 11748 | +      | V13 [Sputnik virophage]                                         | 1592  | 100%        | 0.0       | 100.00%  | Primase; helicase [Nitratiraptor phage NtS-1]                                  | 99.95           | 8.5e-37  |
| 14  | 114       | 11809 | 12153 | +      | V14 [Sputnik virophage]                                         | 218   | 100%        | 2,00E-71  | 100.00%  | Zinc motif and AAA domain [Homo sapiens]                                       | 96.56           | 0.053    |
| 15  | 109       | 12203 | 12532 | -      | V15 [Sputnik virophage]                                         | 216   | 100%        | 2,00E-70  | 100.00%  | No hit                                                                         | -               | -        |
| 16  | 130       | 12570 | 12962 | -      | V16 [Sputnik virophage]                                         | 262   | 100%        | 2,00E-88  | 100.00%  | No hit                                                                         | -               | -        |
| 17  | 187       | 12996 | 13559 | -      | putative IS3 family transposase A protein [Sputnik virophage 2] | 369   | 100%        | 7,00E-129 | 100.00%  | Transcriptional regulator (TetR-type HTH domain) [Corynebacterium glutamicum]  | 97.24           | 0.0016   |
| 18  | 378       | 13912 | 15048 | +      | minor virion protein [Sputnik virophage 2]                      | 763   | 100%        | 0.0       | 100.00%  | Minor virion protein [Sputnik virophage]                                       | 100             | 8.4e-112 |
| 19  | 595       | 15072 | 16859 | +      | V20 [Sputnik virophage]                                         | 1214  | 100%        | 0.0       | 100.00%  | capsid protein V20 [Sputnik virophage]                                         | 100             | 6.8e-139 |
| 20  | 442       | 16919 | 18247 | +      | V21 [Sputnik virophage]                                         | 902   | 100%        | 0.0       | 100.00%  | L544; Transferase [Acanthamoeba polyphaga mimivirus]                           | 100             | 1.4e-40  |

Note: aa: amino acids nr: non redundant protein sequences database



| Hit/prod best hit                                                       | Probability (%) | e-value |
|-------------------------------------------------------------------------|-----------------|---------|
| No hit                                                                  | -               | -       |
| Transmembrane protein: alpha-helical [Escherichia coli]                 | 91.44           | 1       |
| No hit                                                                  | -               | -       |
| Transposase [Corynebacterium glutamicum]                                | 98.52           | 9.4e-7  |
| Endonuclease v alpha chain; recombination, helicase, nuclease [E. coli] | 100             | 1.9e-31 |
| Zinc finger homeobox protein [Homo sapiens]                             | 95.21           | 0.005   |
